# Supplementary material for: Hammett neural networks: prediction of frontier orbital energies of tungsten–benzylidyne photoredox complexes
Source: PubMed Central journal article supplement — Chem Sci. 2019 Jun 12;10(28):6844–54. doi: 10.1039/c9sc02339a (PMC6657405; doi:10.1039/c9sc02339a), 2019-06-12
Supplement: SC-010-C9SC02339A-s001.pdf [file SC-010-C9SC02339A-s001.pdf]

## Supporting Information

### Hammett Neural Networks: Prediction of Frontier Orbital Energies of Tungsten-Benzylidyne Photoredox Complexes

*Alexander M. Chang,<sup>†</sup> Jessica Freeze,<sup>†</sup> and Victor S. Batista<sup>†,\*</sup>*

<sup>†</sup>Department of Chemistry and Energy Sciences Institute, Yale University, New Haven,  
CT, 06520, United States

\*Corresponding Author: [victor.batista@yale.edu](mailto:victor.batista@yale.edu)

#### Table of Contents

|                                                                             |    |
|-----------------------------------------------------------------------------|----|
| I. Derivation of Free-Energy Relation to Rate Constants                     | 2  |
| II. Redox-Active Orbital Visualization                                      | 2  |
| III. Input Parameters.                                                      | 3  |
| IV. PCA Rotation Matrices.                                                  | 15 |
| V. DFT-Obtained and NN-Predicted Energies for All Candidates.               | 17 |
| VI. DFT-Obtained Energies with Dispersion Corrections for Select Candidates | 21 |
| VII. Predicted vs. DFT Energy Parity Plots                                  | 22 |
| VIII. Catalyst Predictions for Regressive Models                            | 27 |
| IX. DFT Theoretical Coordinates.                                            | 28 |
| X. Training and Validation Loss Graph                                       | 32 |
| XI. Effect of $\alpha$ Hyperparameter on Ridge Regression Weights and MSE   | 33 |

## I. Derivation of Free-Energy Relation to Rate Constants

Hammett Equation:

$$\sigma\rho = \log\left(\frac{K}{K_0}\right)$$

Change in free energy between substituted and unsubstituted forms:

$$\Delta\Delta G^\circ = -RT \ln K + RT \ln K_0$$

Relating the equations:

$$-\frac{\Delta\Delta G^\circ}{2.303RT} = \log\left(\frac{K}{K_0}\right) = \sigma\rho$$

Note, the relation between substituent and reaction constants,  $\sigma$  and  $\rho$ , with temperature and solvent independent terms can be found elsewhere<sup>1</sup>.

## II. Redox-Active Orbital Visualization

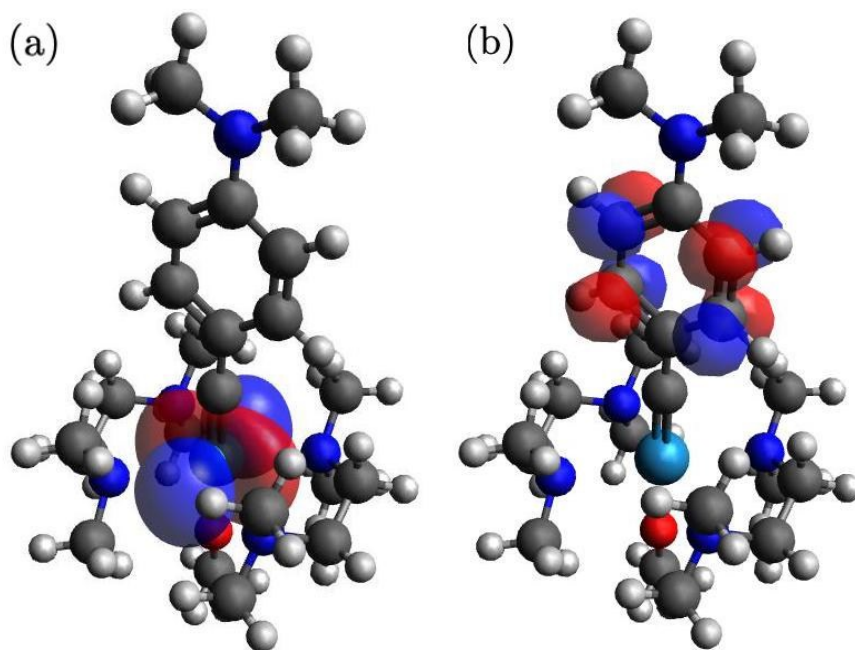

**Figure S1(a-b).** Visualizations of orbitals  $d_{xy}$  (**S1a**), which is usually the HOMO, and  $\pi^*$  (**S1b**), which is usually the LUMO, for molecule **513** in Avogadro 1.2.0.3.

### III. Input Parameters

#### A. Atomic Coordinate HOMO and Atomic Coordinate HOMO-LUMO Gap Sets without labels (Sets 1A/1B)

| RLX | R Per | R Val | L <sub>1</sub> Per | L <sub>1</sub> Val | L <sub>2</sub> Per | L <sub>2</sub> Val | L <sub>3</sub> Per | L <sub>3</sub> Val | X Per | X Val |
|-----|-------|-------|--------------------|--------------------|--------------------|--------------------|--------------------|--------------------|-------|-------|
| 111 | 1     | 1     | 2                  | 5                  | 2                  | 5                  | 2                  | 5                  | 1     | 7     |
| 112 | 1     | 1     | 2                  | 5                  | 2                  | 5                  | 2                  | 5                  | 2     | 7     |
| 113 | 1     | 1     | 2                  | 5                  | 2                  | 5                  | 2                  | 5                  | 2     | 6     |
| 114 | 1     | 1     | 2                  | 5                  | 2                  | 5                  | 2                  | 5                  | 3     | 6     |
| 115 | 1     | 1     | 2                  | 5                  | 2                  | 5                  | 2                  | 5                  | 2     | 5     |
| 121 | 1     | 1     | 3                  | 5                  | 3                  | 5                  | 3                  | 5                  | 1     | 7     |
| 122 | 1     | 1     | 3                  | 5                  | 3                  | 5                  | 3                  | 5                  | 2     | 7     |
| 123 | 1     | 1     | 3                  | 5                  | 3                  | 5                  | 3                  | 5                  | 2     | 6     |
| 124 | 1     | 1     | 3                  | 5                  | 3                  | 5                  | 3                  | 5                  | 3     | 6     |
| 125 | 1     | 1     | 3                  | 5                  | 3                  | 5                  | 3                  | 5                  | 2     | 5     |
| 131 | 1     | 1     | 4                  | 5                  | 4                  | 5                  | 4                  | 5                  | 1     | 7     |
| 132 | 1     | 1     | 4                  | 5                  | 4                  | 5                  | 4                  | 5                  | 2     | 7     |
| 133 | 1     | 1     | 4                  | 5                  | 4                  | 5                  | 4                  | 5                  | 2     | 6     |
| 134 | 1     | 1     | 4                  | 5                  | 4                  | 5                  | 4                  | 5                  | 3     | 6     |
| 135 | 1     | 1     | 4                  | 5                  | 4                  | 5                  | 4                  | 5                  | 2     | 5     |
| 141 | 1     | 1     | 3                  | 6                  | 3                  | 6                  | 3                  | 6                  | 1     | 7     |
| 142 | 1     | 1     | 3                  | 6                  | 3                  | 6                  | 3                  | 6                  | 2     | 7     |
| 143 | 1     | 1     | 3                  | 6                  | 3                  | 6                  | 3                  | 6                  | 2     | 6     |
| 144 | 1     | 1     | 3                  | 6                  | 3                  | 6                  | 3                  | 6                  | 3     | 6     |
| 145 | 1     | 1     | 3                  | 6                  | 3                  | 6                  | 3                  | 6                  | 2     | 5     |
| 151 | 1     | 1     | 2                  | 5                  | 3                  | 5                  | 3                  | 5                  | 1     | 7     |
| 152 | 1     | 1     | 2                  | 5                  | 3                  | 5                  | 3                  | 5                  | 2     | 7     |
| 153 | 1     | 1     | 2                  | 5                  | 3                  | 5                  | 3                  | 5                  | 2     | 6     |
| 154 | 1     | 1     | 2                  | 5                  | 3                  | 5                  | 3                  | 5                  | 3     | 6     |
| 155 | 1     | 1     | 2                  | 5                  | 3                  | 5                  | 3                  | 5                  | 2     | 5     |
| 161 | 1     | 1     | 2                  | 5                  | 3                  | 5                  | 2                  | 5                  | 1     | 7     |
| 162 | 1     | 1     | 2                  | 5                  | 3                  | 5                  | 2                  | 5                  | 2     | 7     |
| 163 | 1     | 1     | 2                  | 5                  | 3                  | 5                  | 2                  | 5                  | 2     | 6     |
| 164 | 1     | 1     | 2                  | 5                  | 3                  | 5                  | 2                  | 5                  | 3     | 6     |
| 165 | 1     | 1     | 2                  | 5                  | 3                  | 5                  | 2                  | 5                  | 2     | 5     |
| 211 | 2     | 4     | 2                  | 5                  | 2                  | 5                  | 2                  | 5                  | 1     | 7     |
| 212 | 2     | 4     | 2                  | 5                  | 2                  | 5                  | 2                  | 5                  | 2     | 7     |
| 213 | 2     | 4     | 2                  | 5                  | 2                  | 5                  | 2                  | 5                  | 2     | 6     |
| 214 | 2     | 4     | 2                  | 5                  | 2                  | 5                  | 2                  | 5                  | 3     | 6     |
| 215 | 2     | 4     | 2                  | 5                  | 2                  | 5                  | 2                  | 5                  | 2     | 5     |
| 221 | 2     | 4     | 3                  | 5                  | 3                  | 5                  | 3                  | 5                  | 1     | 7     |
| 222 | 2     | 4     | 3                  | 5                  | 3                  | 5                  | 3                  | 5                  | 2     | 7     |
| 223 | 2     | 4     | 3                  | 5                  | 3                  | 5                  | 3                  | 5                  | 2     | 6     |
| 224 | 2     | 4     | 3                  | 5                  | 3                  | 5                  | 3                  | 5                  | 3     | 6     |
| 225 | 2     | 4     | 3                  | 5                  | 3                  | 5                  | 3                  | 5                  | 2     | 5     |
| 231 | 2     | 4     | 4                  | 5                  | 4                  | 5                  | 4                  | 5                  | 1     | 7     |

|     |   |   |   |   |   |   |   |   |   |   |
|-----|---|---|---|---|---|---|---|---|---|---|
| 232 | 2 | 4 | 4 | 5 | 4 | 5 | 4 | 5 | 2 | 7 |
| 233 | 2 | 4 | 4 | 5 | 4 | 5 | 4 | 5 | 2 | 6 |
| 234 | 2 | 4 | 4 | 5 | 4 | 5 | 4 | 5 | 3 | 6 |
| 235 | 2 | 4 | 4 | 5 | 4 | 5 | 4 | 5 | 2 | 5 |
| 241 | 2 | 4 | 3 | 6 | 3 | 6 | 3 | 6 | 1 | 7 |
| 242 | 2 | 4 | 3 | 6 | 3 | 6 | 3 | 6 | 2 | 7 |
| 243 | 2 | 4 | 3 | 6 | 3 | 6 | 3 | 6 | 2 | 6 |
| 244 | 2 | 4 | 3 | 6 | 3 | 6 | 3 | 6 | 3 | 6 |
| 245 | 2 | 4 | 3 | 6 | 3 | 6 | 3 | 6 | 2 | 5 |
| 251 | 2 | 4 | 2 | 5 | 3 | 5 | 3 | 5 | 1 | 7 |
| 252 | 2 | 4 | 2 | 5 | 3 | 5 | 3 | 5 | 2 | 7 |
| 253 | 2 | 4 | 2 | 5 | 3 | 5 | 3 | 5 | 2 | 6 |
| 254 | 2 | 4 | 2 | 5 | 3 | 5 | 3 | 5 | 3 | 6 |
| 255 | 2 | 4 | 2 | 5 | 3 | 5 | 3 | 5 | 2 | 5 |
| 261 | 2 | 4 | 2 | 5 | 3 | 5 | 2 | 5 | 1 | 7 |
| 262 | 2 | 4 | 2 | 5 | 3 | 5 | 2 | 5 | 2 | 7 |
| 263 | 2 | 4 | 2 | 5 | 3 | 5 | 2 | 5 | 2 | 6 |
| 264 | 2 | 4 | 2 | 5 | 3 | 5 | 2 | 5 | 3 | 6 |
| 265 | 2 | 4 | 2 | 5 | 3 | 5 | 2 | 5 | 2 | 5 |
| 311 | 2 | 6 | 2 | 5 | 2 | 5 | 2 | 5 | 1 | 7 |
| 312 | 2 | 6 | 2 | 5 | 2 | 5 | 2 | 5 | 2 | 7 |
| 313 | 2 | 6 | 2 | 5 | 2 | 5 | 2 | 5 | 2 | 6 |
| 314 | 2 | 6 | 2 | 5 | 2 | 5 | 2 | 5 | 3 | 6 |
| 315 | 2 | 6 | 2 | 5 | 2 | 5 | 2 | 5 | 2 | 5 |
| 321 | 2 | 6 | 3 | 5 | 3 | 5 | 3 | 5 | 1 | 7 |
| 322 | 2 | 6 | 3 | 5 | 3 | 5 | 3 | 5 | 2 | 7 |
| 323 | 2 | 6 | 3 | 5 | 3 | 5 | 3 | 5 | 2 | 6 |
| 324 | 2 | 6 | 3 | 5 | 3 | 5 | 3 | 5 | 3 | 6 |
| 325 | 2 | 6 | 3 | 5 | 3 | 5 | 3 | 5 | 2 | 5 |
| 331 | 2 | 6 | 4 | 5 | 4 | 5 | 4 | 5 | 1 | 7 |
| 332 | 2 | 6 | 4 | 5 | 4 | 5 | 4 | 5 | 2 | 7 |
| 333 | 2 | 6 | 4 | 5 | 4 | 5 | 4 | 5 | 2 | 6 |
| 334 | 2 | 6 | 4 | 5 | 4 | 5 | 4 | 5 | 3 | 6 |
| 335 | 2 | 6 | 4 | 5 | 4 | 5 | 4 | 5 | 2 | 5 |
| 341 | 2 | 6 | 3 | 6 | 3 | 6 | 3 | 6 | 1 | 7 |
| 342 | 2 | 6 | 3 | 6 | 3 | 6 | 3 | 6 | 2 | 7 |
| 343 | 2 | 6 | 3 | 6 | 3 | 6 | 3 | 6 | 2 | 6 |
| 344 | 2 | 6 | 3 | 6 | 3 | 6 | 3 | 6 | 3 | 6 |
| 345 | 2 | 6 | 3 | 6 | 3 | 6 | 3 | 6 | 2 | 5 |
| 351 | 2 | 6 | 2 | 5 | 3 | 5 | 3 | 5 | 1 | 7 |
| 352 | 2 | 6 | 2 | 5 | 3 | 5 | 3 | 5 | 2 | 7 |
| 353 | 2 | 6 | 2 | 5 | 3 | 5 | 3 | 5 | 2 | 6 |
| 354 | 2 | 6 | 2 | 5 | 3 | 5 | 3 | 5 | 3 | 6 |
| 355 | 2 | 6 | 2 | 5 | 3 | 5 | 3 | 5 | 2 | 5 |
| 361 | 2 | 6 | 2 | 5 | 3 | 5 | 2 | 5 | 1 | 7 |
| 362 | 2 | 6 | 2 | 5 | 3 | 5 | 2 | 5 | 2 | 7 |
| 363 | 2 | 6 | 2 | 5 | 3 | 5 | 2 | 5 | 2 | 6 |
| 364 | 2 | 6 | 2 | 5 | 3 | 5 | 2 | 5 | 3 | 6 |
| 365 | 2 | 6 | 2 | 5 | 3 | 5 | 2 | 5 | 2 | 5 |

|     |   |   |   |   |   |   |   |   |   |   |
|-----|---|---|---|---|---|---|---|---|---|---|
| 411 | 3 | 6 | 2 | 5 | 2 | 5 | 2 | 5 | 1 | 7 |
| 412 | 3 | 6 | 2 | 5 | 2 | 5 | 2 | 5 | 2 | 7 |
| 413 | 3 | 6 | 2 | 5 | 2 | 5 | 2 | 5 | 2 | 6 |
| 414 | 3 | 6 | 2 | 5 | 2 | 5 | 2 | 5 | 3 | 6 |
| 415 | 3 | 6 | 2 | 5 | 2 | 5 | 2 | 5 | 2 | 5 |
| 421 | 3 | 6 | 3 | 5 | 3 | 5 | 3 | 5 | 1 | 7 |
| 422 | 3 | 6 | 3 | 5 | 3 | 5 | 3 | 5 | 2 | 7 |
| 423 | 3 | 6 | 3 | 5 | 3 | 5 | 3 | 5 | 2 | 6 |
| 424 | 3 | 6 | 3 | 5 | 3 | 5 | 3 | 5 | 3 | 6 |
| 425 | 3 | 6 | 3 | 5 | 3 | 5 | 3 | 5 | 2 | 5 |
| 431 | 3 | 6 | 4 | 5 | 4 | 5 | 4 | 5 | 1 | 7 |
| 432 | 3 | 6 | 4 | 5 | 4 | 5 | 4 | 5 | 2 | 7 |
| 433 | 3 | 6 | 4 | 5 | 4 | 5 | 4 | 5 | 2 | 6 |
| 434 | 3 | 6 | 4 | 5 | 4 | 5 | 4 | 5 | 3 | 6 |
| 435 | 3 | 6 | 4 | 5 | 4 | 5 | 4 | 5 | 2 | 5 |
| 441 | 3 | 6 | 3 | 6 | 3 | 6 | 3 | 6 | 1 | 7 |
| 442 | 3 | 6 | 3 | 6 | 3 | 6 | 3 | 6 | 2 | 7 |
| 443 | 3 | 6 | 3 | 6 | 3 | 6 | 3 | 6 | 2 | 6 |
| 444 | 3 | 6 | 3 | 6 | 3 | 6 | 3 | 6 | 3 | 6 |
| 445 | 3 | 6 | 3 | 6 | 3 | 6 | 3 | 6 | 2 | 5 |
| 451 | 3 | 6 | 2 | 5 | 3 | 5 | 3 | 5 | 1 | 7 |
| 452 | 3 | 6 | 2 | 5 | 3 | 5 | 3 | 5 | 2 | 7 |
| 453 | 3 | 6 | 2 | 5 | 3 | 5 | 3 | 5 | 2 | 6 |
| 454 | 3 | 6 | 2 | 5 | 3 | 5 | 3 | 5 | 3 | 6 |
| 455 | 3 | 6 | 2 | 5 | 3 | 5 | 3 | 5 | 2 | 5 |
| 461 | 3 | 6 | 2 | 5 | 3 | 5 | 2 | 5 | 1 | 7 |
| 462 | 3 | 6 | 2 | 5 | 3 | 5 | 2 | 5 | 2 | 7 |
| 463 | 3 | 6 | 2 | 5 | 3 | 5 | 2 | 5 | 2 | 6 |
| 464 | 3 | 6 | 2 | 5 | 3 | 5 | 2 | 5 | 3 | 6 |
| 465 | 3 | 6 | 2 | 5 | 3 | 5 | 2 | 5 | 2 | 5 |
| 511 | 2 | 5 | 2 | 5 | 2 | 5 | 2 | 5 | 1 | 7 |
| 512 | 2 | 5 | 2 | 5 | 2 | 5 | 2 | 5 | 2 | 7 |
| 513 | 2 | 5 | 2 | 5 | 2 | 5 | 2 | 5 | 2 | 6 |
| 514 | 2 | 5 | 2 | 5 | 2 | 5 | 2 | 5 | 3 | 6 |
| 515 | 2 | 5 | 2 | 5 | 2 | 5 | 2 | 5 | 2 | 5 |
| 521 | 2 | 5 | 3 | 5 | 3 | 5 | 3 | 5 | 1 | 7 |
| 522 | 2 | 5 | 3 | 5 | 3 | 5 | 3 | 5 | 2 | 7 |
| 523 | 2 | 5 | 3 | 5 | 3 | 5 | 3 | 5 | 2 | 6 |
| 524 | 2 | 5 | 3 | 5 | 3 | 5 | 3 | 5 | 3 | 6 |
| 525 | 2 | 5 | 3 | 5 | 3 | 5 | 3 | 5 | 2 | 5 |
| 531 | 2 | 5 | 4 | 5 | 4 | 5 | 4 | 5 | 1 | 7 |
| 532 | 2 | 5 | 4 | 5 | 4 | 5 | 4 | 5 | 2 | 7 |
| 533 | 2 | 5 | 4 | 5 | 4 | 5 | 4 | 5 | 2 | 6 |
| 534 | 2 | 5 | 4 | 5 | 4 | 5 | 4 | 5 | 3 | 6 |
| 535 | 2 | 5 | 4 | 5 | 4 | 5 | 4 | 5 | 2 | 5 |
| 541 | 2 | 5 | 3 | 6 | 3 | 6 | 3 | 6 | 1 | 7 |
| 542 | 2 | 5 | 3 | 6 | 3 | 6 | 3 | 6 | 2 | 7 |
| 543 | 2 | 5 | 3 | 6 | 3 | 6 | 3 | 6 | 2 | 6 |
| 544 | 2 | 5 | 3 | 6 | 3 | 6 | 3 | 6 | 3 | 6 |

|            |   |   |   |   |   |   |   |   |   |   |
|------------|---|---|---|---|---|---|---|---|---|---|
| <b>545</b> | 2 | 5 | 3 | 6 | 3 | 6 | 3 | 6 | 2 | 5 |
| <b>551</b> | 2 | 5 | 2 | 5 | 3 | 5 | 3 | 5 | 1 | 7 |
| <b>552</b> | 2 | 5 | 2 | 5 | 3 | 5 | 3 | 5 | 2 | 7 |
| <b>553</b> | 2 | 5 | 2 | 5 | 3 | 5 | 3 | 5 | 2 | 6 |
| <b>554</b> | 2 | 5 | 2 | 5 | 3 | 5 | 3 | 5 | 3 | 6 |
| <b>555</b> | 2 | 5 | 2 | 5 | 3 | 5 | 3 | 5 | 2 | 5 |
| <b>561</b> | 2 | 5 | 2 | 5 | 3 | 5 | 2 | 5 | 1 | 7 |
| <b>562</b> | 2 | 5 | 2 | 5 | 3 | 5 | 2 | 5 | 2 | 7 |
| <b>563</b> | 2 | 5 | 2 | 5 | 3 | 5 | 2 | 5 | 2 | 6 |
| <b>564</b> | 2 | 5 | 2 | 5 | 3 | 5 | 2 | 5 | 3 | 6 |
| <b>565</b> | 2 | 5 | 2 | 5 | 3 | 5 | 2 | 5 | 2 | 5 |

**B. Hammett Constants HOMO and Hammett Constants HOMO-LUMO Gap Sets without labels (Sets 2A/2B)**

| RLX | R $\sigma_m$ | R $\sigma_p$ | L <sub>1</sub> $\sigma_m$ | L <sub>1</sub> $\sigma_p$ | L <sub>2</sub> $\sigma_m$ | L <sub>2</sub> $\sigma_p$ | L <sub>3</sub> $\sigma_m$ | L <sub>3</sub> $\sigma_p$ | X $\sigma_m$ | X $\sigma_p$ |
|-----|--------------|--------------|---------------------------|---------------------------|---------------------------|---------------------------|---------------------------|---------------------------|--------------|--------------|
| 111 | 0            | 0            | -0.23                     | -0.72                     | -0.23                     | -0.72                     | -0.23                     | -0.72                     | 0.34         | 0.06         |
| 112 | 0            | 0            | -0.23                     | -0.72                     | -0.23                     | -0.72                     | -0.23                     | -0.72                     | 0.37         | 0.23         |
| 113 | 0            | 0            | -0.23                     | -0.72                     | -0.23                     | -0.72                     | -0.23                     | -0.72                     | 0.12         | -0.27        |
| 114 | 0            | 0            | -0.23                     | -0.72                     | -0.23                     | -0.72                     | -0.23                     | -0.72                     | 0.15         | 0            |
| 115 | 0            | 0            | -0.23                     | -0.72                     | -0.23                     | -0.72                     | -0.23                     | -0.72                     | -0.16        | -0.83        |
| 121 | 0            | 0            | 0.10                      | 0.13                      | 0.10                      | 0.13                      | 0.10                      | 0.13                      | 0.34         | 0.06         |
| 122 | 0            | 0            | 0.10                      | 0.13                      | 0.10                      | 0.13                      | 0.10                      | 0.13                      | 0.37         | 0.23         |
| 123 | 0            | 0            | 0.10                      | 0.13                      | 0.10                      | 0.13                      | 0.10                      | 0.13                      | 0.12         | -0.27        |
| 124 | 0            | 0            | 0.10                      | 0.13                      | 0.10                      | 0.13                      | 0.10                      | 0.13                      | 0.15         | 0            |
| 125 | 0            | 0            | 0.10                      | 0.13                      | 0.10                      | 0.13                      | 0.10                      | 0.13                      | -0.16        | -0.83        |
| 131 | 0            | 0            | 0.22                      | 0                         | 0.22                      | 0                         | 0.22                      | 0                         | 0.34         | 0.06         |
| 132 | 0            | 0            | 0.22                      | 0                         | 0.22                      | 0                         | 0.22                      | 0                         | 0.37         | 0.23         |
| 133 | 0            | 0            | 0.22                      | 0                         | 0.22                      | 0                         | 0.22                      | 0                         | 0.12         | -0.27        |
| 134 | 0            | 0            | 0.22                      | 0                         | 0.22                      | 0                         | 0.22                      | 0                         | 0.15         | 0            |
| 135 | 0            | 0            | 0.22                      | 0                         | 0.22                      | 0                         | 0.22                      | 0                         | -0.16        | -0.83        |
| 141 | 0            | 0            | 0.18                      | 0.03                      | 0.18                      | 0.03                      | 0.18                      | 0.03                      | 0.34         | 0.06         |
| 142 | 0            | 0            | 0.18                      | 0.03                      | 0.18                      | 0.03                      | 0.18                      | 0.03                      | 0.37         | 0.23         |
| 143 | 0            | 0            | 0.18                      | 0.03                      | 0.18                      | 0.03                      | 0.18                      | 0.03                      | 0.12         | -0.27        |
| 144 | 0            | 0            | 0.18                      | 0.03                      | 0.18                      | 0.03                      | 0.18                      | 0.03                      | 0.15         | 0            |
| 145 | 0            | 0            | 0.18                      | 0.03                      | 0.18                      | 0.03                      | 0.18                      | 0.03                      | -0.16        | -0.83        |
| 151 | 0            | 0            | -0.23                     | -0.72                     | 0.10                      | 0.13                      | 0.10                      | 0.13                      | 0.34         | 0.06         |
| 152 | 0            | 0            | -0.23                     | -0.72                     | 0.10                      | 0.13                      | 0.10                      | 0.13                      | 0.37         | 0.23         |
| 153 | 0            | 0            | -0.23                     | -0.72                     | 0.10                      | 0.13                      | 0.10                      | 0.13                      | 0.12         | -0.27        |
| 154 | 0            | 0            | -0.23                     | -0.72                     | 0.10                      | 0.13                      | 0.10                      | 0.13                      | 0.15         | 0            |
| 155 | 0            | 0            | -0.23                     | -0.72                     | 0.10                      | 0.13                      | 0.10                      | 0.13                      | -0.16        | -0.83        |
| 161 | 0            | 0            | -0.23                     | -0.72                     | 0.10                      | 0.13                      | -0.23                     | -0.72                     | 0.34         | 0.06         |
| 162 | 0            | 0            | -0.23                     | -0.72                     | 0.10                      | 0.13                      | -0.23                     | -0.72                     | 0.37         | 0.23         |
| 163 | 0            | 0            | -0.23                     | -0.72                     | 0.10                      | 0.13                      | -0.23                     | -0.72                     | 0.12         | -0.27        |
| 164 | 0            | 0            | -0.23                     | -0.72                     | 0.10                      | 0.13                      | -0.23                     | -0.72                     | 0.15         | 0            |
| 165 | 0            | 0            | -0.23                     | -0.72                     | 0.10                      | 0.13                      | -0.23                     | -0.72                     | -0.16        | -0.83        |
| 211 | -0.07        | -0.17        | -0.23                     | -0.72                     | -0.23                     | -0.72                     | -0.23                     | -0.72                     | 0.34         | 0.06         |
| 212 | -0.07        | -0.17        | -0.23                     | -0.72                     | -0.23                     | -0.72                     | -0.23                     | -0.72                     | 0.37         | 0.23         |
| 213 | -0.07        | -0.17        | -0.23                     | -0.72                     | -0.23                     | -0.72                     | -0.23                     | -0.72                     | 0.12         | -0.27        |
| 214 | -0.07        | -0.17        | -0.23                     | -0.72                     | -0.23                     | -0.72                     | -0.23                     | -0.72                     | 0.15         | 0            |
| 215 | -0.07        | -0.17        | -0.23                     | -0.72                     | -0.23                     | -0.72                     | -0.23                     | -0.72                     | -0.16        | -0.83        |
| 221 | -0.07        | -0.17        | 0.10                      | 0.13                      | 0.10                      | 0.13                      | 0.10                      | 0.13                      | 0.34         | 0.06         |
| 222 | -0.07        | -0.17        | 0.10                      | 0.13                      | 0.10                      | 0.13                      | 0.10                      | 0.13                      | 0.37         | 0.23         |
| 223 | -0.07        | -0.17        | 0.10                      | 0.13                      | 0.10                      | 0.13                      | 0.10                      | 0.13                      | 0.12         | -0.27        |
| 224 | -0.07        | -0.17        | 0.10                      | 0.13                      | 0.10                      | 0.13                      | 0.10                      | 0.13                      | 0.15         | 0            |
| 225 | -0.07        | -0.17        | 0.10                      | 0.13                      | 0.10                      | 0.13                      | 0.10                      | 0.13                      | -0.16        | -0.83        |
| 231 | -0.07        | -0.17        | 0.22                      | 0                         | 0.22                      | 0                         | 0.22                      | 0                         | 0.34         | 0.06         |
| 232 | -0.07        | -0.17        | 0.22                      | 0                         | 0.22                      | 0                         | 0.22                      | 0                         | 0.37         | 0.23         |
| 233 | -0.07        | -0.17        | 0.22                      | 0                         | 0.22                      | 0                         | 0.22                      | 0                         | 0.12         | -0.27        |
| 234 | -0.07        | -0.17        | 0.22                      | 0                         | 0.22                      | 0                         | 0.22                      | 0                         | 0.15         | 0            |

|     |       |       |       |       |       |       |       |       |       |       |
|-----|-------|-------|-------|-------|-------|-------|-------|-------|-------|-------|
| 235 | -0.07 | -0.17 | 0.22  | 0     | 0.22  | 0     | 0.22  | 0     | -0.16 | -0.83 |
| 241 | -0.07 | -0.17 | 0.18  | 0.03  | 0.18  | 0.03  | 0.18  | 0.03  | 0.34  | 0.06  |
| 242 | -0.07 | -0.17 | 0.18  | 0.03  | 0.18  | 0.03  | 0.18  | 0.03  | 0.37  | 0.23  |
| 243 | -0.07 | -0.17 | 0.18  | 0.03  | 0.18  | 0.03  | 0.18  | 0.03  | 0.12  | -0.27 |
| 244 | -0.07 | -0.17 | 0.18  | 0.03  | 0.18  | 0.03  | 0.18  | 0.03  | 0.15  | 0     |
| 245 | -0.07 | -0.17 | 0.18  | 0.03  | 0.18  | 0.03  | 0.18  | 0.03  | -0.16 | -0.83 |
| 251 | -0.07 | -0.17 | -0.23 | -0.72 | 0.10  | 0.13  | 0.10  | 0.13  | 0.34  | 0.06  |
| 252 | -0.07 | -0.17 | -0.23 | -0.72 | 0.10  | 0.13  | 0.10  | 0.13  | 0.37  | 0.23  |
| 253 | -0.07 | -0.17 | -0.23 | -0.72 | 0.10  | 0.13  | 0.10  | 0.13  | 0.12  | -0.27 |
| 254 | -0.07 | -0.17 | -0.23 | -0.72 | 0.10  | 0.13  | 0.10  | 0.13  | 0.15  | 0     |
| 255 | -0.07 | -0.17 | -0.23 | -0.72 | 0.10  | 0.13  | 0.10  | 0.13  | -0.16 | -0.83 |
| 261 | -0.07 | -0.17 | -0.23 | -0.72 | 0.10  | 0.13  | -0.23 | -0.72 | 0.34  | 0.06  |
| 262 | -0.07 | -0.17 | -0.23 | -0.72 | 0.10  | 0.13  | -0.23 | -0.72 | 0.37  | 0.23  |
| 263 | -0.07 | -0.17 | -0.23 | -0.72 | 0.10  | 0.13  | -0.23 | -0.72 | 0.12  | -0.27 |
| 264 | -0.07 | -0.17 | -0.23 | -0.72 | 0.10  | 0.13  | -0.23 | -0.72 | 0.15  | 0     |
| 265 | -0.07 | -0.17 | -0.23 | -0.72 | 0.10  | 0.13  | -0.23 | -0.72 | -0.16 | -0.83 |
| 311 | 0.12  | -0.27 | -0.23 | -0.72 | -0.23 | -0.72 | -0.23 | -0.72 | 0.34  | 0.06  |
| 312 | 0.12  | -0.27 | -0.23 | -0.72 | -0.23 | -0.72 | -0.23 | -0.72 | 0.37  | 0.23  |
| 313 | 0.12  | -0.27 | -0.23 | -0.72 | -0.23 | -0.72 | -0.23 | -0.72 | 0.12  | -0.27 |
| 314 | 0.12  | -0.27 | -0.23 | -0.72 | -0.23 | -0.72 | -0.23 | -0.72 | 0.15  | 0     |
| 315 | 0.12  | -0.27 | -0.23 | -0.72 | -0.23 | -0.72 | -0.23 | -0.72 | -0.16 | -0.83 |
| 321 | 0.12  | -0.27 | 0.10  | 0.13  | 0.10  | 0.13  | 0.10  | 0.13  | 0.34  | 0.06  |
| 322 | 0.12  | -0.27 | 0.10  | 0.13  | 0.10  | 0.13  | 0.10  | 0.13  | 0.37  | 0.23  |
| 323 | 0.12  | -0.27 | 0.10  | 0.13  | 0.10  | 0.13  | 0.10  | 0.13  | 0.12  | -0.27 |
| 324 | 0.12  | -0.27 | 0.10  | 0.13  | 0.10  | 0.13  | 0.10  | 0.13  | 0.15  | 0     |
| 325 | 0.12  | -0.27 | 0.10  | 0.13  | 0.10  | 0.13  | 0.10  | 0.13  | -0.16 | -0.83 |
| 331 | 0.12  | -0.27 | 0.22  | 0     | 0.22  | 0     | 0.22  | 0     | 0.34  | 0.06  |
| 332 | 0.12  | -0.27 | 0.22  | 0     | 0.22  | 0     | 0.22  | 0     | 0.37  | 0.23  |
| 333 | 0.12  | -0.27 | 0.22  | 0     | 0.22  | 0     | 0.22  | 0     | 0.12  | -0.27 |
| 334 | 0.12  | -0.27 | 0.22  | 0     | 0.22  | 0     | 0.22  | 0     | 0.15  | 0     |
| 335 | 0.12  | -0.27 | 0.22  | 0     | 0.22  | 0     | 0.22  | 0     | -0.16 | -0.83 |
| 341 | 0.12  | -0.27 | 0.18  | 0.03  | 0.18  | 0.03  | 0.18  | 0.03  | 0.34  | 0.06  |
| 342 | 0.12  | -0.27 | 0.18  | 0.03  | 0.18  | 0.03  | 0.18  | 0.03  | 0.37  | 0.23  |
| 343 | 0.12  | -0.27 | 0.18  | 0.03  | 0.18  | 0.03  | 0.18  | 0.03  | 0.12  | -0.27 |
| 344 | 0.12  | -0.27 | 0.18  | 0.03  | 0.18  | 0.03  | 0.18  | 0.03  | 0.15  | 0     |
| 345 | 0.12  | -0.27 | 0.18  | 0.03  | 0.18  | 0.03  | 0.18  | 0.03  | -0.16 | -0.83 |
| 351 | 0.12  | -0.27 | -0.23 | -0.72 | 0.10  | 0.13  | 0.10  | 0.13  | 0.34  | 0.06  |
| 352 | 0.12  | -0.27 | -0.23 | -0.72 | 0.10  | 0.13  | 0.10  | 0.13  | 0.37  | 0.23  |
| 353 | 0.12  | -0.27 | -0.23 | -0.72 | 0.10  | 0.13  | 0.10  | 0.13  | 0.12  | -0.27 |
| 354 | 0.12  | -0.27 | -0.23 | -0.72 | 0.10  | 0.13  | 0.10  | 0.13  | 0.15  | 0     |
| 355 | 0.12  | -0.27 | -0.23 | -0.72 | 0.10  | 0.13  | 0.10  | 0.13  | -0.16 | -0.83 |
| 361 | 0.12  | -0.27 | -0.23 | -0.72 | 0.10  | 0.13  | -0.23 | -0.72 | 0.34  | 0.06  |
| 362 | 0.12  | -0.27 | -0.23 | -0.72 | 0.10  | 0.13  | -0.23 | -0.72 | 0.37  | 0.23  |
| 363 | 0.12  | -0.27 | -0.23 | -0.72 | 0.10  | 0.13  | -0.23 | -0.72 | 0.12  | -0.27 |
| 364 | 0.12  | -0.27 | -0.23 | -0.72 | 0.10  | 0.13  | -0.23 | -0.72 | 0.15  | 0     |
| 365 | 0.12  | -0.27 | -0.23 | -0.72 | 0.10  | 0.13  | -0.23 | -0.72 | -0.16 | -0.83 |
| 411 | 0.15  | 0     | -0.23 | -0.72 | -0.23 | -0.72 | -0.23 | -0.72 | 0.34  | 0.06  |
| 412 | 0.15  | 0     | -0.23 | -0.72 | -0.23 | -0.72 | -0.23 | -0.72 | 0.37  | 0.23  |
| 413 | 0.15  | 0     | -0.23 | -0.72 | -0.23 | -0.72 | -0.23 | -0.72 | 0.12  | -0.27 |



|     |       |       |       |       |       |       |       |       |       |       |
|-----|-------|-------|-------|-------|-------|-------|-------|-------|-------|-------|
| 414 | 0.15  | 0     | -0.23 | -0.72 | -0.23 | -0.72 | -0.23 | -0.72 | 0.15  | 0     |
| 415 | 0.15  | 0     | -0.23 | -0.72 | -0.23 | -0.72 | -0.23 | -0.72 | -0.16 | -0.83 |
| 421 | 0.15  | 0     | 0.10  | 0.13  | 0.10  | 0.13  | 0.10  | 0.13  | 0.34  | 0.06  |
| 422 | 0.15  | 0     | 0.10  | 0.13  | 0.10  | 0.13  | 0.10  | 0.13  | 0.37  | 0.23  |
| 423 | 0.15  | 0     | 0.10  | 0.13  | 0.10  | 0.13  | 0.10  | 0.13  | 0.12  | -0.27 |
| 424 | 0.15  | 0     | 0.10  | 0.13  | 0.10  | 0.13  | 0.10  | 0.13  | 0.15  | 0     |
| 425 | 0.15  | 0     | 0.10  | 0.13  | 0.10  | 0.13  | 0.10  | 0.13  | -0.16 | -0.83 |
| 431 | 0.15  | 0     | 0.22  | 0     | 0.22  | 0     | 0.22  | 0     | 0.34  | 0.06  |
| 432 | 0.15  | 0     | 0.22  | 0     | 0.22  | 0     | 0.22  | 0     | 0.37  | 0.23  |
| 433 | 0.15  | 0     | 0.22  | 0     | 0.22  | 0     | 0.22  | 0     | 0.12  | -0.27 |
| 434 | 0.15  | 0     | 0.22  | 0     | 0.22  | 0     | 0.22  | 0     | 0.15  | 0     |
| 435 | 0.15  | 0     | 0.22  | 0     | 0.22  | 0     | 0.22  | 0     | -0.16 | -0.83 |
| 441 | 0.15  | 0     | 0.18  | 0.03  | 0.18  | 0.03  | 0.18  | 0.03  | 0.34  | 0.06  |
| 442 | 0.15  | 0     | 0.18  | 0.03  | 0.18  | 0.03  | 0.18  | 0.03  | 0.37  | 0.23  |
| 443 | 0.15  | 0     | 0.18  | 0.03  | 0.18  | 0.03  | 0.18  | 0.03  | 0.12  | -0.27 |
| 444 | 0.15  | 0     | 0.18  | 0.03  | 0.18  | 0.03  | 0.18  | 0.03  | 0.15  | 0     |
| 445 | 0.15  | 0     | 0.18  | 0.03  | 0.18  | 0.03  | 0.18  | 0.03  | -0.16 | -0.83 |
| 451 | 0.15  | 0     | -0.23 | -0.72 | 0.10  | 0.13  | 0.10  | 0.13  | 0.34  | 0.06  |
| 452 | 0.15  | 0     | -0.23 | -0.72 | 0.10  | 0.13  | 0.10  | 0.13  | 0.37  | 0.23  |
| 453 | 0.15  | 0     | -0.23 | -0.72 | 0.10  | 0.13  | 0.10  | 0.13  | 0.12  | -0.27 |
| 454 | 0.15  | 0     | -0.23 | -0.72 | 0.10  | 0.13  | 0.10  | 0.13  | 0.15  | 0     |
| 455 | 0.15  | 0     | -0.23 | -0.72 | 0.10  | 0.13  | 0.10  | 0.13  | -0.16 | -0.83 |
| 461 | 0.15  | 0     | -0.23 | -0.72 | 0.10  | 0.13  | -0.23 | -0.72 | 0.34  | 0.06  |
| 462 | 0.15  | 0     | -0.23 | -0.72 | 0.10  | 0.13  | -0.23 | -0.72 | 0.37  | 0.23  |
| 463 | 0.15  | 0     | -0.23 | -0.72 | 0.10  | 0.13  | -0.23 | -0.72 | 0.12  | -0.27 |
| 464 | 0.15  | 0     | -0.23 | -0.72 | 0.10  | 0.13  | -0.23 | -0.72 | 0.15  | 0     |
| 465 | 0.15  | 0     | -0.23 | -0.72 | 0.10  | 0.13  | -0.23 | -0.72 | -0.16 | -0.83 |
| 511 | -0.16 | -0.83 | -0.23 | -0.72 | -0.23 | -0.72 | -0.23 | -0.72 | 0.34  | 0.06  |
| 512 | -0.16 | -0.83 | -0.23 | -0.72 | -0.23 | -0.72 | -0.23 | -0.72 | 0.37  | 0.23  |
| 513 | -0.16 | -0.83 | -0.23 | -0.72 | -0.23 | -0.72 | -0.23 | -0.72 | 0.12  | -0.27 |
| 514 | -0.16 | -0.83 | -0.23 | -0.72 | -0.23 | -0.72 | -0.23 | -0.72 | 0.15  | 0     |
| 515 | -0.16 | -0.83 | -0.23 | -0.72 | -0.23 | -0.72 | -0.23 | -0.72 | -0.16 | -0.83 |
| 521 | -0.16 | -0.83 | 0.10  | 0.13  | 0.10  | 0.13  | 0.10  | 0.13  | 0.34  | 0.06  |
| 522 | -0.16 | -0.83 | 0.10  | 0.13  | 0.10  | 0.13  | 0.10  | 0.13  | 0.37  | 0.23  |
| 523 | -0.16 | -0.83 | 0.10  | 0.13  | 0.10  | 0.13  | 0.10  | 0.13  | 0.12  | -0.27 |
| 524 | -0.16 | -0.83 | 0.10  | 0.13  | 0.10  | 0.13  | 0.10  | 0.13  | 0.15  | 0     |
| 525 | -0.16 | -0.83 | 0.10  | 0.13  | 0.10  | 0.13  | 0.10  | 0.13  | -0.16 | -0.83 |
| 531 | -0.16 | -0.83 | 0.22  | 0     | 0.22  | 0     | 0.22  | 0     | 0.34  | 0.06  |
| 532 | -0.16 | -0.83 | 0.22  | 0     | 0.22  | 0     | 0.22  | 0     | 0.37  | 0.23  |
| 533 | -0.16 | -0.83 | 0.22  | 0     | 0.22  | 0     | 0.22  | 0     | 0.12  | -0.27 |
| 534 | -0.16 | -0.83 | 0.22  | 0     | 0.22  | 0     | 0.22  | 0     | 0.15  | 0     |
| 535 | -0.16 | -0.83 | 0.22  | 0     | 0.22  | 0     | 0.22  | 0     | -0.16 | -0.83 |
| 541 | -0.16 | -0.83 | 0.18  | 0.03  | 0.18  | 0.03  | 0.18  | 0.03  | 0.34  | 0.06  |
| 542 | -0.16 | -0.83 | 0.18  | 0.03  | 0.18  | 0.03  | 0.18  | 0.03  | 0.37  | 0.23  |
| 543 | -0.16 | -0.83 | 0.18  | 0.03  | 0.18  | 0.03  | 0.18  | 0.03  | 0.12  | -0.27 |
| 544 | -0.16 | -0.83 | 0.18  | 0.03  | 0.18  | 0.03  | 0.18  | 0.03  | 0.15  | 0     |
| 545 | -0.16 | -0.83 | 0.18  | 0.03  | 0.18  | 0.03  | 0.18  | 0.03  | -0.16 | -0.83 |
| 551 | -0.16 | -0.83 | -0.23 | -0.72 | 0.10  | 0.13  | 0.10  | 0.13  | 0.34  | 0.06  |
| 552 | -0.16 | -0.83 | -0.23 | -0.72 | 0.10  | 0.13  | 0.10  | 0.13  | 0.37  | 0.23  |

|            |       |       |       |       |      |      |       |       |       |       |
|------------|-------|-------|-------|-------|------|------|-------|-------|-------|-------|
| <b>553</b> | -0.16 | -0.83 | -0.23 | -0.72 | 0.10 | 0.13 | 0.10  | 0.13  | 0.12  | -0.27 |
| <b>554</b> | -0.16 | -0.83 | -0.23 | -0.72 | 0.10 | 0.13 | 0.10  | 0.13  | 0.15  | 0     |
| <b>555</b> | -0.16 | -0.83 | -0.23 | -0.72 | 0.10 | 0.13 | 0.10  | 0.13  | -0.16 | -0.83 |
| <b>561</b> | -0.16 | -0.83 | -0.23 | -0.72 | 0.10 | 0.13 | -0.23 | -0.72 | 0.34  | 0.06  |
| <b>562</b> | -0.16 | -0.83 | -0.23 | -0.72 | 0.10 | 0.13 | -0.23 | -0.72 | 0.37  | 0.23  |
| <b>563</b> | -0.16 | -0.83 | -0.23 | -0.72 | 0.10 | 0.13 | -0.23 | -0.72 | 0.12  | -0.27 |
| <b>564</b> | -0.16 | -0.83 | -0.23 | -0.72 | 0.10 | 0.13 | -0.23 | -0.72 | 0.15  | 0     |
| <b>565</b> | -0.16 | -0.83 | -0.23 | -0.72 | 0.10 | 0.13 | -0.23 | -0.72 | -0.16 | -0.83 |

C. Hammett Constants HOMO and Hammett Constants HOMO-LUMO Gap Smaller  
Sets without labels (Sets **3A/3B**)

This set of 30 molecules was systematically selected such that each option at each site would appear an equal number of times and that each pair of options between sites are seen in at least one molecule.

| RLX | R $\sigma_m$ | R $\sigma_p$ | L <sub>1</sub> $\sigma_m$ | L <sub>1</sub> $\sigma_p$ | L <sub>2</sub> $\sigma_m$ | L <sub>2</sub> $\sigma_p$ | L <sub>3</sub> $\sigma_m$ | L <sub>3</sub> $\sigma_p$ | X $\sigma_m$ | X $\sigma_p$ |
|-----|--------------|--------------|---------------------------|---------------------------|---------------------------|---------------------------|---------------------------|---------------------------|--------------|--------------|
| 111 | 0            | 0            | -0.23                     | -0.72                     | -0.23                     | -0.72                     | -0.23                     | -0.72                     | 0.34         | 0.06         |
| 122 | 0            | 0            | 0.10                      | 0.13                      | 0.10                      | 0.13                      | 0.10                      | 0.13                      | 0.37         | 0.23         |
| 133 | 0            | 0            | 0.22                      | 0                         | 0.22                      | 0                         | 0.22                      | 0                         | 0.12         | -0.27        |
| 144 | 0            | 0            | 0.18                      | 0.03                      | 0.18                      | 0.03                      | 0.18                      | 0.03                      | 0.15         | 0            |
| 155 | 0            | 0            | -0.23                     | -0.72                     | 0.10                      | 0.13                      | 0.10                      | 0.13                      | -0.16        | -0.83        |
| 161 | 0            | 0            | -0.23                     | -0.72                     | 0.10                      | 0.13                      | -0.23                     | -0.72                     | 0.34         | 0.06         |
| 212 | -0.07        | -0.17        | -0.23                     | -0.72                     | -0.23                     | -0.72                     | -0.23                     | -0.72                     | 0.37         | 0.23         |
| 223 | -0.07        | -0.17        | 0.10                      | 0.13                      | 0.10                      | 0.13                      | 0.10                      | 0.13                      | 0.12         | -0.27        |
| 234 | -0.07        | -0.17        | 0.22                      | 0                         | 0.22                      | 0                         | 0.22                      | 0                         | 0.15         | 0            |
| 245 | -0.07        | -0.17        | 0.18                      | 0.03                      | 0.18                      | 0.03                      | 0.18                      | 0.03                      | -0.16        | -0.83        |
| 251 | -0.07        | -0.17        | -0.23                     | -0.72                     | 0.10                      | 0.13                      | 0.10                      | 0.13                      | 0.34         | 0.06         |
| 262 | -0.07        | -0.17        | -0.23                     | -0.72                     | 0.10                      | 0.13                      | -0.23                     | -0.72                     | 0.37         | 0.23         |
| 313 | 0.12         | -0.27        | -0.23                     | -0.72                     | -0.23                     | -0.72                     | -0.23                     | -0.72                     | 0.12         | -0.27        |
| 324 | 0.12         | -0.27        | 0.10                      | 0.13                      | 0.10                      | 0.13                      | 0.10                      | 0.13                      | 0.15         | 0            |
| 335 | 0.12         | -0.27        | 0.22                      | 0                         | 0.22                      | 0                         | 0.22                      | 0                         | -0.16        | -0.83        |
| 341 | 0.12         | -0.27        | 0.18                      | 0.03                      | 0.18                      | 0.03                      | 0.18                      | 0.03                      | 0.34         | 0.06         |
| 352 | 0.12         | -0.27        | -0.23                     | -0.72                     | 0.10                      | 0.13                      | 0.10                      | 0.13                      | 0.37         | 0.23         |
| 363 | 0.12         | -0.27        | -0.23                     | -0.72                     | 0.10                      | 0.13                      | -0.23                     | -0.72                     | 0.12         | -0.27        |
| 414 | 0.15         | 0            | -0.23                     | -0.72                     | -0.23                     | -0.72                     | -0.23                     | -0.72                     | 0.15         | 0            |
| 425 | 0.15         | 0            | 0.10                      | 0.13                      | 0.10                      | 0.13                      | 0.10                      | 0.13                      | -0.16        | -0.83        |
| 431 | 0.15         | 0            | 0.22                      | 0                         | 0.22                      | 0                         | 0.22                      | 0                         | 0.34         | 0.06         |
| 442 | 0.15         | 0            | 0.18                      | 0.03                      | 0.18                      | 0.03                      | 0.18                      | 0.03                      | 0.37         | 0.23         |
| 453 | 0.15         | 0            | -0.23                     | -0.72                     | 0.10                      | 0.13                      | 0.10                      | 0.13                      | 0.12         | -0.27        |
| 464 | 0.15         | 0            | -0.23                     | -0.72                     | 0.10                      | 0.13                      | -0.23                     | -0.72                     | 0.15         | 0            |
| 515 | -0.16        | -0.83        | -0.23                     | -0.72                     | -0.23                     | -0.72                     | -0.23                     | -0.72                     | -0.16        | -0.83        |
| 521 | -0.16        | -0.83        | 0.10                      | 0.13                      | 0.10                      | 0.13                      | 0.10                      | 0.13                      | 0.34         | 0.06         |
| 532 | -0.16        | -0.83        | 0.22                      | 0                         | 0.22                      | 0                         | 0.22                      | 0                         | 0.37         | 0.23         |
| 543 | -0.16        | -0.83        | 0.18                      | 0.03                      | 0.18                      | 0.03                      | 0.18                      | 0.03                      | 0.12         | -0.27        |
| 554 | -0.16        | -0.83        | -0.23                     | -0.72                     | 0.10                      | 0.13                      | 0.10                      | 0.13                      | 0.15         | 0            |
| 565 | -0.16        | -0.83        | -0.23                     | -0.72                     | 0.10                      | 0.13                      | -0.23                     | -0.72                     | -0.16        | -0.83        |

**D. Hammett Constants HOMO and Hammett Constants HOMO-LUMO Gap LASSO Regression Sets without labels (Sets 4A/4B)**

This data set is identical to sets **3A/3B**, but with the removal of certain Hammett parameters as suggested by the LASSO regression performed on set **3A**.

| <b>RLX</b> | $\mathbf{R}^{\sigma_m}$ | $\mathbf{R}^{\sigma_p}$ | $\mathbf{L}_1^{\sigma_p}$ | $\mathbf{L}_2^{\sigma_m}$ | $\mathbf{L}_2^{\sigma_p}$ | $\mathbf{L}_3^{\sigma_p}$ | $\mathbf{X}^{\sigma_p}$ |
|------------|-------------------------|-------------------------|---------------------------|---------------------------|---------------------------|---------------------------|-------------------------|
| <b>111</b> | 0                       | 0                       | -0.72                     | -0.23                     | -0.72                     | -0.72                     | 0.06                    |
| <b>122</b> | 0                       | 0                       | 0.13                      | 0.10                      | 0.13                      | 0.13                      | 0.23                    |
| <b>133</b> | 0                       | 0                       | 0                         | 0.22                      | 0                         | 0                         | -0.27                   |
| <b>144</b> | 0                       | 0                       | 0.03                      | 0.18                      | 0.03                      | 0.03                      | 0                       |
| <b>155</b> | 0                       | 0                       | -0.72                     | 0.10                      | 0.13                      | 0.13                      | -0.83                   |
| <b>161</b> | 0                       | 0                       | -0.72                     | 0.10                      | 0.13                      | -0.72                     | 0.06                    |
| <b>212</b> | -0.07                   | -0.17                   | -0.72                     | -0.23                     | -0.72                     | -0.72                     | 0.23                    |
| <b>223</b> | -0.07                   | -0.17                   | 0.13                      | 0.10                      | 0.13                      | 0.13                      | -0.27                   |
| <b>234</b> | -0.07                   | -0.17                   | 0                         | 0.22                      | 0                         | 0                         | 0                       |
| <b>245</b> | -0.07                   | -0.17                   | 0.03                      | 0.18                      | 0.03                      | 0.03                      | -0.83                   |
| <b>251</b> | -0.07                   | -0.17                   | -0.72                     | 0.10                      | 0.13                      | 0.13                      | 0.06                    |
| <b>262</b> | -0.07                   | -0.17                   | -0.72                     | 0.10                      | 0.13                      | -0.72                     | 0.23                    |
| <b>313</b> | 0.12                    | -0.27                   | -0.72                     | -0.23                     | -0.72                     | -0.72                     | -0.27                   |
| <b>324</b> | 0.12                    | -0.27                   | 0.13                      | 0.10                      | 0.13                      | 0.13                      | 0                       |
| <b>335</b> | 0.12                    | -0.27                   | 0                         | 0.22                      | 0                         | 0                         | -0.83                   |
| <b>341</b> | 0.12                    | -0.27                   | 0.03                      | 0.18                      | 0.03                      | 0.03                      | 0.06                    |
| <b>352</b> | 0.12                    | -0.27                   | -0.72                     | 0.10                      | 0.13                      | 0.13                      | 0.23                    |
| <b>363</b> | 0.12                    | -0.27                   | -0.72                     | 0.10                      | 0.13                      | -0.72                     | -0.27                   |
| <b>414</b> | 0.15                    | 0                       | -0.72                     | -0.23                     | -0.72                     | -0.72                     | 0                       |
| <b>425</b> | 0.15                    | 0                       | 0.13                      | 0.10                      | 0.13                      | 0.13                      | -0.83                   |
| <b>431</b> | 0.15                    | 0                       | 0                         | 0.22                      | 0                         | 0                         | 0.06                    |
| <b>442</b> | 0.15                    | 0                       | 0.03                      | 0.18                      | 0.03                      | 0.03                      | 0.23                    |
| <b>453</b> | 0.15                    | 0                       | -0.72                     | 0.10                      | 0.13                      | 0.13                      | -0.27                   |
| <b>464</b> | 0.15                    | 0                       | -0.72                     | 0.10                      | 0.13                      | -0.72                     | 0                       |
| <b>515</b> | -0.16                   | -0.83                   | -0.72                     | -0.23                     | -0.72                     | -0.72                     | -0.83                   |
| <b>521</b> | -0.16                   | -0.83                   | 0.13                      | 0.10                      | 0.13                      | 0.13                      | 0.06                    |
| <b>532</b> | -0.16                   | -0.83                   | 0                         | 0.22                      | 0                         | 0                         | 0.23                    |
| <b>543</b> | -0.16                   | -0.83                   | 0.03                      | 0.18                      | 0.03                      | 0.03                      | -0.27                   |
| <b>554</b> | -0.16                   | -0.83                   | -0.72                     | 0.10                      | 0.13                      | 0.13                      | 0                       |
| <b>565</b> | -0.16                   | -0.83                   | -0.72                     | 0.10                      | 0.13                      | -0.72                     | -0.83                   |

### E. Hammett Constants HOMO Stepwise Regression Set without labels (Set 5A)

This data set is identical to set 3A, but with the removal of certain Hammett parameters as suggested by the stepwise regression performed on set 3A.

| RLX | $R \sigma_p$ | $L_1 \sigma_m$ | $L_1 \sigma_p$ | $L_2 \sigma_m$ | $L_3 \sigma_m$ | $X \sigma_p$ |
|-----|--------------|----------------|----------------|----------------|----------------|--------------|
| 111 | 0            | -0.23          | -0.72          | -0.23          | -0.23          | 0.06         |
| 122 | 0            | 0.10           | 0.13           | 0.10           | 0.10           | 0.23         |
| 133 | 0            | 0.22           | 0              | 0.22           | 0.22           | -0.27        |
| 144 | 0            | 0.18           | 0.03           | 0.18           | 0.18           | 0            |
| 155 | 0            | -0.23          | -0.72          | 0.10           | 0.10           | -0.83        |
| 161 | 0            | -0.23          | -0.72          | 0.10           | -0.23          | 0.06         |
| 212 | -0.17        | -0.23          | -0.72          | -0.23          | -0.23          | 0.23         |
| 223 | -0.17        | 0.10           | 0.13           | 0.10           | 0.10           | -0.27        |
| 234 | -0.17        | 0.22           | 0              | 0.22           | 0.22           | 0            |
| 245 | -0.17        | 0.18           | 0.03           | 0.18           | 0.18           | -0.83        |
| 251 | -0.17        | -0.23          | -0.72          | 0.10           | 0.10           | 0.06         |
| 262 | -0.17        | -0.23          | -0.72          | 0.10           | -0.23          | 0.23         |
| 313 | -0.27        | -0.23          | -0.72          | -0.23          | -0.23          | -0.27        |
| 324 | -0.27        | 0.10           | 0.13           | 0.10           | 0.10           | 0            |
| 335 | -0.27        | 0.22           | 0              | 0.22           | 0.22           | -0.83        |
| 341 | -0.27        | 0.18           | 0.03           | 0.18           | 0.18           | 0.06         |
| 352 | -0.27        | -0.23          | -0.72          | 0.10           | 0.10           | 0.23         |
| 363 | -0.27        | -0.23          | -0.72          | 0.10           | -0.23          | -0.27        |
| 414 | 0            | -0.23          | -0.72          | -0.23          | -0.23          | 0            |
| 425 | 0            | 0.10           | 0.13           | 0.10           | 0.10           | -0.83        |
| 431 | 0            | 0.22           | 0              | 0.22           | 0.22           | 0.06         |
| 442 | 0            | 0.18           | 0.03           | 0.18           | 0.18           | 0.23         |
| 453 | 0            | -0.23          | -0.72          | 0.10           | 0.10           | -0.27        |
| 464 | 0            | -0.23          | -0.72          | 0.10           | -0.23          | 0            |
| 515 | -0.83        | -0.23          | -0.72          | -0.23          | -0.23          | -0.83        |
| 521 | -0.83        | 0.10           | 0.13           | 0.10           | 0.10           | 0.06         |
| 532 | -0.83        | 0.22           | 0              | 0.22           | 0.22           | 0.23         |
| 543 | -0.83        | 0.18           | 0.03           | 0.18           | 0.18           | -0.27        |
| 554 | -0.83        | -0.23          | -0.72          | 0.10           | 0.10           | 0            |
| 565 | -0.83        | -0.23          | -0.72          | 0.10           | -0.23          | -0.83        |

**F. Hammett Constants HOMO-LUMO Gap Stepwise Regression Set without labels (Set 5B)**

This data set is identical to set **3B**, but with the removal of certain Hammett parameters as suggested by the stepwise regression performed on set **3B**.

| <b>RLX</b> | <b>R</b> $\sigma_m$ | <b>R</b> $\sigma_p$ | <b>L</b> <sub>1</sub> $\sigma_p$ | <b>L</b> <sub>2</sub> $\sigma_m$ | <b>L</b> <sub>2</sub> $\sigma_p$ | <b>X</b> $\sigma_m$ | <b>X</b> $\sigma_p$ |
|------------|---------------------|---------------------|----------------------------------|----------------------------------|----------------------------------|---------------------|---------------------|
| 111        | 0                   | 0                   | -0.72                            | -0.23                            | -0.72                            | 0.34                | 0.06                |
| 122        | 0                   | 0                   | 0.13                             | 0.10                             | 0.13                             | 0.37                | 0.23                |
| 133        | 0                   | 0                   | 0                                | 0.22                             | 0                                | 0.12                | -0.27               |
| 144        | 0                   | 0                   | 0.03                             | 0.18                             | 0.03                             | 0.15                | 0                   |
| 155        | 0                   | 0                   | -0.72                            | 0.10                             | 0.13                             | -0.16               | -0.83               |
| 161        | 0                   | 0                   | -0.72                            | 0.10                             | 0.13                             | 0.34                | 0.06                |
| 212        | -0.07               | -0.17               | -0.72                            | -0.23                            | -0.72                            | 0.37                | 0.23                |
| 223        | -0.07               | -0.17               | 0.13                             | 0.10                             | 0.13                             | 0.12                | -0.27               |
| 234        | -0.07               | -0.17               | 0                                | 0.22                             | 0                                | 0.15                | 0                   |
| 245        | -0.07               | -0.17               | 0.03                             | 0.18                             | 0.03                             | -0.16               | -0.83               |
| 251        | -0.07               | -0.17               | -0.72                            | 0.10                             | 0.13                             | 0.34                | 0.06                |
| 262        | -0.07               | -0.17               | -0.72                            | 0.10                             | 0.13                             | 0.37                | 0.23                |
| 313        | 0.12                | -0.27               | -0.72                            | -0.23                            | -0.72                            | 0.12                | -0.27               |
| 324        | 0.12                | -0.27               | 0.13                             | 0.10                             | 0.13                             | 0.15                | 0                   |
| 335        | 0.12                | -0.27               | 0                                | 0.22                             | 0                                | -0.16               | -0.83               |
| 341        | 0.12                | -0.27               | 0.03                             | 0.18                             | 0.03                             | 0.34                | 0.06                |
| 352        | 0.12                | -0.27               | -0.72                            | 0.10                             | 0.13                             | 0.37                | 0.23                |
| 363        | 0.12                | -0.27               | -0.72                            | 0.10                             | 0.13                             | 0.12                | -0.27               |
| 414        | 0.15                | 0                   | -0.72                            | -0.23                            | -0.72                            | 0.15                | 0                   |
| 425        | 0.15                | 0                   | 0.13                             | 0.10                             | 0.13                             | -0.16               | -0.83               |
| 431        | 0.15                | 0                   | 0                                | 0.22                             | 0                                | 0.34                | 0.06                |
| 442        | 0.15                | 0                   | 0.03                             | 0.18                             | 0.03                             | 0.37                | 0.23                |
| 453        | 0.15                | 0                   | -0.72                            | 0.10                             | 0.13                             | 0.12                | -0.27               |
| 464        | 0.15                | 0                   | -0.72                            | 0.10                             | 0.13                             | 0.15                | 0                   |
| 515        | -0.16               | -0.83               | -0.72                            | -0.23                            | -0.72                            | -0.16               | -0.83               |
| 521        | -0.16               | -0.83               | 0.13                             | 0.10                             | 0.13                             | 0.34                | 0.06                |
| 532        | -0.16               | -0.83               | 0                                | 0.22                             | 0                                | 0.37                | 0.23                |
| 543        | -0.16               | -0.83               | 0.03                             | 0.18                             | 0.03                             | 0.12                | -0.27               |
| 554        | -0.16               | -0.83               | -0.72                            | 0.10                             | 0.13                             | 0.15                | 0                   |
| 565        | -0.16               | -0.83               | -0.72                            | 0.10                             | 0.13                             | -0.16               | -0.83               |

## IV. Principal Component Analysis Results

### Rotation Matrices

|                                            | PC1   | PC2   | PC3   |
|--------------------------------------------|-------|-------|-------|
| $\mathbf{R}^{\sigma_m}$                    | 0.01  | -0.01 | -0.71 |
| $\mathbf{R}^{\sigma_p}$                    | 0.01  | -0.01 | -0.71 |
| $\mathbf{L}_1^{\sigma_m}$                  | 0.37  | 0.02  | 0.01  |
| $\mathbf{L}_1^{\sigma_p}$                  | 0.37  | 0.02  | 0.01  |
| $\mathbf{L}_2^{\sigma_m}$                  | 0.38  | 0.02  | 0.01  |
| $\mathbf{L}_2^{\sigma_p}$                  | 0.31  | 0.01  | 0.00  |
| $\mathbf{L}_3^{\sigma_m}$                  | 0.40  | 0.02  | 0.01  |
| $\mathbf{L}_3^{\sigma_p}$                  | 0.38  | 0.02  | 0.01  |
| $\mathbf{X}^{\sigma_m}$                    | 0.01  | -0.71 | 0.01  |
| $\mathbf{X}^{\sigma_p}$                    | 0.01  | -0.71 | 0.01  |
| $\mathbf{E}_{\text{DFT}}(\mathbf{d}_{xy})$ | -0.42 | 0.05  | 0.04  |

|                                                                             | PC1   | PC2   | PC3   |
|-----------------------------------------------------------------------------|-------|-------|-------|
| $\mathbf{R}^{\sigma_m}$                                                     | 0.02  | -0.04 | 0.69  |
| $\mathbf{R}^{\sigma_p}$                                                     | 0.03  | -0.05 | 0.70  |
| $\mathbf{L}_1^{\sigma_m}$                                                   | -0.38 | -0.02 | 0.04  |
| $\mathbf{L}_1^{\sigma_p}$                                                   | -0.37 | -0.02 | 0.03  |
| $\mathbf{L}_2^{\sigma_m}$                                                   | -0.38 | -0.02 | 0.03  |
| $\mathbf{L}_2^{\sigma_p}$                                                   | -0.31 | -0.01 | 0.02  |
| $\mathbf{L}_3^{\sigma_m}$                                                   | -0.40 | -0.03 | 0.05  |
| $\mathbf{L}_3^{\sigma_p}$                                                   | -0.38 | -0.03 | 0.04  |
| $\mathbf{X}^{\sigma_m}$                                                     | -0.02 | 0.70  | 0.05  |
| $\mathbf{X}^{\sigma_p}$                                                     | -0.01 | 0.70  | 0.06  |
| $\mathbf{E}_{\text{DFT}}(\pi^*) - \mathbf{E}_{\text{DFT}}(\mathbf{d}_{xy})$ | -0.41 | 0.07  | -0.12 |

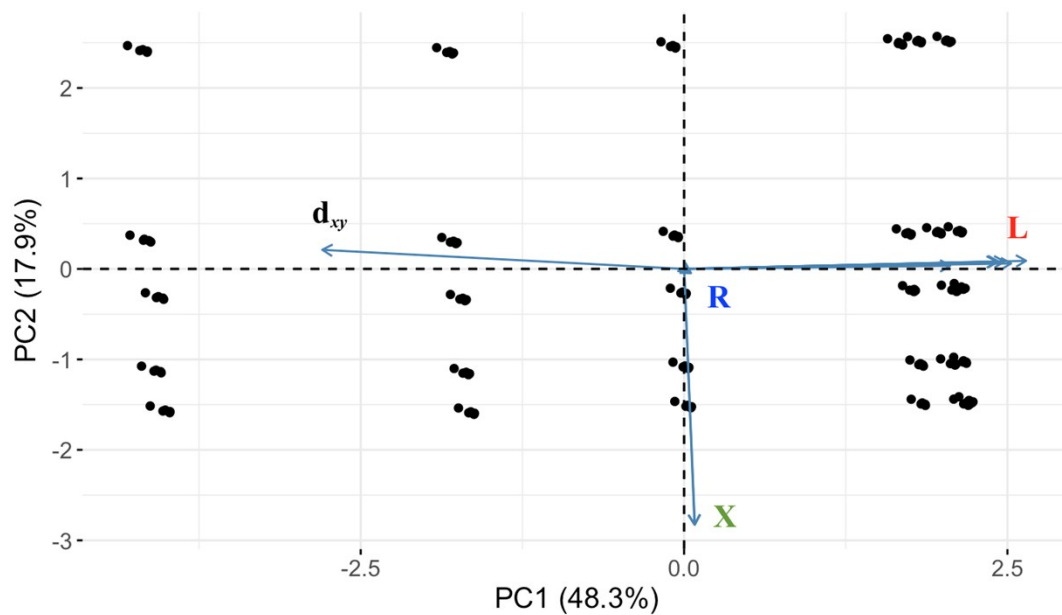

**Figure S2.** A biplot of the first two principal components for dataset **HCHO**. The vectors corresponding to the Hammett parameters at the L site point away from the vector of the  $d_{xy}$  energy label, showing anticorrelation between the two. The R vector is small because the third principal component dimension is not plotted. Black dots mark the 150 molecules in the input data.



## V. DFT-Obtained and NN-Predicted Energies for All Candidates

| Compound <sup>a</sup> | DFT $E(d_{xy})^{b,f,g}$ | ML $E(d_{xy})^g$ | DFT $E(\pi^*) - E(d_{xy})^{b,d,f,g}$ | ML $E(\pi^*) - E(d_{xy})^g$ |
|-----------------------|-------------------------|------------------|--------------------------------------|-----------------------------|
| 111                   | -2.52                   | -2.59(3)         | 2.47                                 | 2.45(3)                     |
| 112                   | -2.60                   | -2.56(2)         | 2.31                                 | 2.34(3)                     |
| 113                   | -2.44                   | -2.48(6)         | 2.47                                 | 2.37(5)                     |
| 114                   | -2.56                   | -2.43(5)         | 2.18                                 | 2.20(6)                     |
| 115                   | -2.47                   | -2.34(15)        | 2.25                                 | 2.28(14)                    |
| 121                   | -4.05                   | -4.11(3)         | 3.47                                 | 3.47(3)                     |
| 122                   | -4.06                   | -4.05(3)         | 3.30                                 | 3.35(3)                     |
| 123                   | -3.97                   | -4.01(3)         | 3.46                                 | 3.37(4)                     |
| 124                   | -3.99                   | -3.93(4)         | 3.17                                 | 3.19(4)                     |
| 125                   | -3.92                   | -3.86(3)         | 3.03                                 | 3.22(3)                     |
| 131                   | -3.95                   | -4.12(4)         | 3.38                                 | 3.46(2)                     |
| 132                   | -4.01                   | -4.06(3)         | 3.24                                 | 3.34(3)                     |
| 133                   | -3.95                   | -4.02(2)         | 3.43                                 | 3.36(2)                     |
| 134                   | -3.96                   | -3.94(3)         | 3.10                                 | 3.18(4)                     |
| 135                   | -3.88 <sup>c</sup>      | -3.86(3)         | 3.15 <sup>c</sup>                    | 3.23(4)                     |
| 141                   | -4.08                   | -4.10(3)         | 3.46                                 | 3.45(2)                     |
| 142                   | -4.20                   | -4.04(2)         | 3.41                                 | 3.33(2)                     |
| 143                   | -3.96                   | -4.00(2)         | 3.42                                 | 3.36(2)                     |
| 144                   | -4.12                   | -3.92(3)         | 3.34                                 | 3.18(3)                     |
| 145                   | -3.81                   | -3.84(3)         | 3.23                                 | 3.22(3)                     |
| 151                   | -3.53                   | -3.56(4)         | 3.03                                 | 3.02(2)                     |
| 152                   | -3.54                   | -3.51(5)         | 2.88                                 | 2.90(4)                     |
| 153                   | -3.45                   | -3.49(3)         | 3.01                                 | 2.94(2)                     |
| 154                   | -3.52                   | -3.39(5)         | 2.74                                 | 2.75(5)                     |
| 155                   | -3.48                   | -3.40(4)         | 2.84                                 | 2.86(3)                     |
| 161                   | -3.36                   | -3.40(3)         | 2.99                                 | 2.97(3)                     |
| 162                   | -3.40                   | -3.37(3)         | 2.83                                 | 2.86(4)                     |
| 163                   | -3.27                   | -3.28(6)         | 2.97                                 | 2.89(5)                     |
| 164                   | -3.34                   | -3.23(5)         | 2.72                                 | 2.71(6)                     |
| 165                   | -3.28                   | -3.10(14)        | 2.80                                 | 2.81(15)                    |
| 211                   | -2.49                   | -2.58(3)         | 2.50                                 | 2.50(4)                     |
| 212                   | -2.57                   | -2.55(4)         | 2.34                                 | 2.40(3)                     |
| 213                   | -2.40                   | -2.46(5)         | 2.49                                 | 2.42(4)                     |
| 214                   | -2.53                   | -2.42(6)         | 2.22                                 | 2.25(5)                     |
| 215                   | -2.43                   | -2.33(12)        | 2.29                                 | 2.33(11)                    |
| 221                   | -4.03                   | -4.10(3)         | 3.52                                 | 3.53(3)                     |

|            |                    |           |                   |          |
|------------|--------------------|-----------|-------------------|----------|
| <b>222</b> | -4.04              | -4.04(3)  | 3.36              | 3.41(3)  |
| <b>223</b> | -3.94              | -4.00(2)  | 3.51              | 3.43(3)  |
| <b>224</b> | -3.99              | -3.91(5)  | 3.19              | 3.25(4)  |
| <b>225</b> | -3.90 <sup>c</sup> | -3.84(4)  | 3.24 <sup>c</sup> | 3.28(3)  |
| <b>231</b> | -3.93              | -4.10(4)  | 3.43              | 3.51(2)  |
| <b>232</b> | -3.98              | -4.04(3)  | 3.28              | 3.40(3)  |
| <b>233</b> | -3.93              | -4.00(2)  | 3.47              | 3.42(2)  |
| <b>234</b> | -3.93              | -3.92(3)  | 3.14              | 3.24(3)  |
| <b>235</b> | -3.85 <sup>c</sup> | -3.84(3)  | 3.19 <sup>c</sup> | 3.29(3)  |
| <b>241</b> | -4.05              | -4.08(3)  | 3.50              | 3.51(3)  |
| <b>242</b> | -4.18              | -4.02(2)  | 3.46              | 3.39(3)  |
| <b>243</b> | -3.94              | -3.98(2)  | 3.46              | 3.42(3)  |
| <b>244</b> | -4.09              | -3.90(3)  | 3.39              | 3.23(3)  |
| <b>245</b> | -3.79              | -3.82(3)  | 3.27              | 3.28(2)  |
| <b>251</b> | -3.50              | -3.54(3)  | 3.07              | 3.08(2)  |
| <b>252</b> | -3.51              | -3.48(4)  | 2.92              | 2.96(4)  |
| <b>253</b> | -3.43              | -3.47(3)  | 3.05              | 3.00(2)  |
| <b>254</b> | -3.49              | -3.37(5)  | 2.78              | 2.81(5)  |
| <b>255</b> | -3.46              | -3.37(5)  | 2.89              | 2.91(3)  |
| <b>261</b> | -3.33              | -3.38(3)  | 3.03              | 3.02(4)  |
| <b>262</b> | -3.37              | -3.35(3)  | 2.87              | 2.92(3)  |
| <b>263</b> | -3.24              | -3.25(6)  | 3.00              | 2.95(5)  |
| <b>264</b> | -3.32              | -3.21(5)  | 2.75              | 2.77(5)  |
| <b>265</b> | -3.25              | -3.08(15) | 2.83              | 2.86(13) |
| <b>311</b> | -2.46              | -2.59(6)  | 2.68 <sup>e</sup> | 2.63(6)  |
| <b>312</b> | -2.54              | -2.56(7)  | 2.47              | 2.53(5)  |
| <b>313</b> | -2.39              | -2.47(4)  | 2.68 <sup>e</sup> | 2.55(4)  |
| <b>314</b> | -2.50              | -2.43(5)  | 2.35              | 2.39(4)  |
| <b>315</b> | -2.40              | -2.33(10) | 2.41              | 2.45(10) |
| <b>321</b> | -4.01              | -4.08(3)  | 3.67              | 3.64(3)  |
| <b>322</b> | -4.02              | -4.03(3)  | 3.50              | 3.52(2)  |
| <b>323</b> | -3.91              | -3.99(2)  | 3.65              | 3.54(3)  |
| <b>324</b> | -3.94              | -3.90(4)  | 3.32              | 3.37(3)  |
| <b>325</b> | -3.89 <sup>c</sup> | -3.84(3)  | 3.38 <sup>c</sup> | 3.39(4)  |
| <b>331</b> | -3.92              | -4.08(4)  | 3.58              | 3.62(3)  |
| <b>332</b> | -3.96              | -4.03(3)  | 3.43              | 3.51(2)  |
| <b>333</b> | -3.90              | -3.99(3)  | 3.56              | 3.53(3)  |
| <b>334</b> | -3.93              | -3.91(3)  | 3.27              | 3.35(3)  |
| <b>335</b> | -3.83 <sup>c</sup> | -3.84(3)  | 3.33 <sup>c</sup> | 3.39(4)  |
| <b>341</b> | -4.02              | -4.07(3)  | 3.65              | 3.62(3)  |
| <b>342</b> | -4.15              | -4.01(2)  | 3.60              | 3.51(2)  |

|     |                    |           |                   |          |
|-----|--------------------|-----------|-------------------|----------|
| 343 | -3.92              | -3.98(3)  | 3.58              | 3.52(3)  |
| 344 | -4.06              | -3.89(3)  | 3.44              | 3.35(3)  |
| 345 | -3.77              | -3.83(3)  | 3.41              | 3.38(4)  |
| 351 | -3.47              | -3.53(3)  | 3.20              | 3.19(2)  |
| 352 | -3.49              | -3.48(3)  | 3.06              | 3.08(3)  |
| 353 | -3.40              | -3.45(3)  | 3.18              | 3.11(3)  |
| 354 | -3.47              | -3.36(5)  | 2.90              | 2.93(5)  |
| 355 | -3.43              | -3.36(6)  | 3.02              | 3.01(5)  |
| 361 | -3.29              | -3.38(6)  | 3.15              | 3.14(5)  |
| 362 | -3.34              | -3.35(7)  | 3.01              | 3.03(4)  |
| 363 | -3.20              | -3.25(4)  | 3.13              | 3.06(4)  |
| 364 | -3.28              | -3.21(4)  | 2.87              | 2.89(4)  |
| 365 | -3.21              | -3.08(13) | 2.94              | 2.97(12) |
| 411 | -2.52              | -2.60(4)  | 2.47              | 2.51(4)  |
| 412 | -2.59              | -2.57(4)  | 2.32              | 2.41(4)  |
| 413 | -2.45              | -2.49(5)  | 2.47              | 2.43(5)  |
| 414 | -2.56              | -2.45(4)  | 2.22              | 2.27(5)  |
| 415 | -2.46              | -2.34(14) | 2.26              | 2.34(14) |
| 421 | -4.04              | -4.11(3)  | 3.49              | 3.51(3)  |
| 422 | -4.05              | -4.04(3)  | 3.32              | 3.40(2)  |
| 423 | -3.95              | -4.02(2)  | 3.47              | 3.42(3)  |
| 424 | -3.97              | -3.93(4)  | 3.17              | 3.24(3)  |
| 425 | -3.92 <sup>c</sup> | -3.87(2)  | 3.21 <sup>c</sup> | 3.26(3)  |
| 431 | -3.94              | -4.12(4)  | 3.40              | 3.51(2)  |
| 432 | -3.99              | -4.06(3)  | 3.25              | 3.39(2)  |
| 433 | -3.93              | -4.03(3)  | 3.44              | 3.41(3)  |
| 434 | -3.93              | -3.94(3)  | 3.11              | 3.23(3)  |
| 435 | -3.86 <sup>c</sup> | -3.87(3)  | 3.16 <sup>c</sup> | 3.27(4)  |
| 441 | -4.06              | -4.10(3)  | 3.25              | 3.50(3)  |
| 442 | -4.18              | -4.04(2)  | 3.47              | 3.39(2)  |
| 443 | -3.95              | -4.01(3)  | 3.42              | 3.41(3)  |
| 444 | -4.09              | -3.92(3)  | 3.42              | 3.23(3)  |
| 445 | -3.80              | -3.86(3)  | 3.31              | 3.26(4)  |
| 451 | -3.51              | -3.56(4)  | 3.04              | 3.07(3)  |
| 452 | -3.53              | -3.51(5)  | 2.89              | 2.95(4)  |
| 453 | -3.44              | -3.49(2)  | 3.02              | 2.99(2)  |
| 454 | -3.50              | -3.39(5)  | 2.75              | 2.80(5)  |
| 455 | -3.46              | -3.40(4)  | 2.86              | 2.90(4)  |
| 461 | -3.34              | -3.41(4)  | 2.99              | 3.02(4)  |
| 462 | -3.38              | -3.38(5)  | 2.84              | 2.92(5)  |
| 463 | -3.24              | -3.29(4)  | 2.97              | 2.94(4)  |

|            |                    |           |                   |          |
|------------|--------------------|-----------|-------------------|----------|
| <b>464</b> | -3.32              | -3.25(4)  | 2.72              | 2.77(5)  |
| <b>465</b> | -3.25              | -3.11(13) | 2.79              | 2.86(14) |
| <b>511</b> | -2.37              | -2.50(13) | 2.72 <sup>e</sup> | 2.72(12) |
| <b>512</b> | -2.45              | -2.47(15) | 2.57              | 2.62(11) |
| <b>513</b> | -2.29              | -2.39(9)  | 2.70 <sup>e</sup> | 2.63(9)  |
| <b>514</b> | -2.43              | -2.33(13) | 2.45              | 2.48(10) |
| <b>515</b> | -2.31              | -2.28(2)  | 2.49              | 2.54(3)  |
| <b>521</b> | -3.96              | -3.94(3)  | 3.78              | 3.72(3)  |
| <b>522</b> | -3.96              | -3.88(3)  | 3.61              | 3.61(3)  |
| <b>523</b> | -3.86              | -3.84(5)  | 3.72              | 3.63(5)  |
| <b>524</b> | -3.90              | -3.76(5)  | 3.43              | 3.46(5)  |
| <b>525</b> | -3.82 <sup>c</sup> | -3.70(11) | 3.48 <sup>c</sup> | 3.49(11) |
| <b>531</b> | -3.86              | -3.94(4)  | 3.69              | 3.69(3)  |
| <b>532</b> | -3.91              | -3.88(3)  | 3.55              | 3.59(3)  |
| <b>533</b> | -3.84              | -3.84(7)  | 3.66              | 3.60(5)  |
| <b>534</b> | -3.89              | -3.76(5)  | 3.39              | 3.44(4)  |
| <b>535</b> | -3.78 <sup>c</sup> | -3.71(12) | 3.45 <sup>c</sup> | 3.48(11) |
| <b>541</b> | -3.96              | -3.92(4)  | 3.75              | 3.70(3)  |
| <b>542</b> | -4.08              | -3.86(2)  | 3.71              | 3.59(3)  |
| <b>543</b> | -3.86              | -3.82(6)  | 3.68              | 3.60(5)  |
| <b>544</b> | -3.99              | -3.74(4)  | 3.54              | 3.44(4)  |
| <b>545</b> | -3.71 <sup>c</sup> | -3.68(12) | 3.49 <sup>c</sup> | 3.47(11) |
| <b>551</b> | -3.41              | -3.42(10) | 3.29              | 3.29(7)  |
| <b>552</b> | -3.41              | -3.37(11) | 3.15              | 3.18(8)  |
| <b>553</b> | -3.34              | -3.33(12) | 3.25              | 3.20(8)  |
| <b>554</b> | -3.40              | -3.25(12) | 2.99              | 3.03(9)  |
| <b>555</b> | -3.37              | -3.23(15) | 3.11              | 3.11(12) |
| <b>561</b> | -3.24              | -3.27(13) | 3.26              | 3.23(10) |
| <b>562</b> | -3.27              | -3.24(14) | 3.11              | 3.13(9)  |
| <b>563</b> | -3.15              | -3.14(13) | 3.22              | 3.15(10) |
| <b>564</b> | -3.22              | -3.10(12) | 2.95              | 2.98(9)  |
| <b>565</b> | -3.15              | -2.98(22) | 3.01              | 3.05(13) |

<sup>a</sup>All R groups are in the *para* position. <sup>b</sup>Unless otherwise specified,  $d_{xy}$  is the HOMO. <sup>c</sup>HOMO-1

used as  $d_{xy}$ . <sup>d</sup>Unless otherwise specified,  $\pi^*$  is the LUMO. <sup>e</sup>LUMO+1 used as  $\pi^*$ . <sup>f</sup>All DFT

calculations reported include the THF dielectric continuum model. <sup>g</sup>All energies have unit eV.

## VI. DFT-Obtained Energies with Dispersion Corrections for Select Candidates

| Compound   | DFT $E_{\text{disp}}(\mathbf{d}_{xy})$ | $\Delta E_{\text{disp}}(\mathbf{d}_{xy})^a$ | DFT $E_{\text{disp}}(\pi^*) - E_{\text{disp}}(\mathbf{d}_{xy})$ | $\Delta E_{\text{disp}}(\mathbf{d}_{xy} - \pi^*)^b$ |
|------------|----------------------------------------|---------------------------------------------|-----------------------------------------------------------------|-----------------------------------------------------|
| <b>121</b> | -5.95                                  | 1.90                                        | 7.14                                                            | -3.67                                               |
| <b>231</b> | -5.81                                  | 1.88                                        | 7.09                                                            | -3.66                                               |
| <b>242</b> | -6.01                                  | 1.83                                        | 7.10                                                            | -3.64                                               |
| <b>334</b> | -5.81                                  | 1.88                                        | 6.95                                                            | -3.68                                               |
| <b>362</b> | -5.23                                  | 1.89                                        | 6.69                                                            | -3.68                                               |
| <b>424</b> | -5.85                                  | 1.88                                        | 6.78                                                            | -3.61                                               |
| <b>455</b> | -5.32                                  | 1.86                                        | 6.48                                                            | -3.62                                               |
| <b>513</b> | -4.25                                  | 1.96                                        | 6.44                                                            | -3.74                                               |
| <b>515</b> | -4.27                                  | 1.96                                        | 6.23                                                            | -3.74                                               |
| <b>543</b> | -5.67                                  | 1.81                                        | 7.30                                                            | -3.62                                               |

<sup>a</sup> $\Delta E_{\text{disp}}(\mathbf{d}_{xy})$  is the difference between the non-dispersion-corrected  $\mathbf{d}_{xy}$  energy and the dispersion-corrected  $\mathbf{d}_{xy}$  energy. <sup>b</sup> $\Delta E_{\text{disp}}(\mathbf{d}_{xy} - \pi^*)$  is the difference between the non-dispersion-corrected  $\mathbf{d}_{xy} - \pi^*$  energy gap and the dispersion-corrected  $\mathbf{d}_{xy} - \pi^*$  energy gap. All units are in eV.

## VII. Predicted vs. DFT Energy Parity Plots

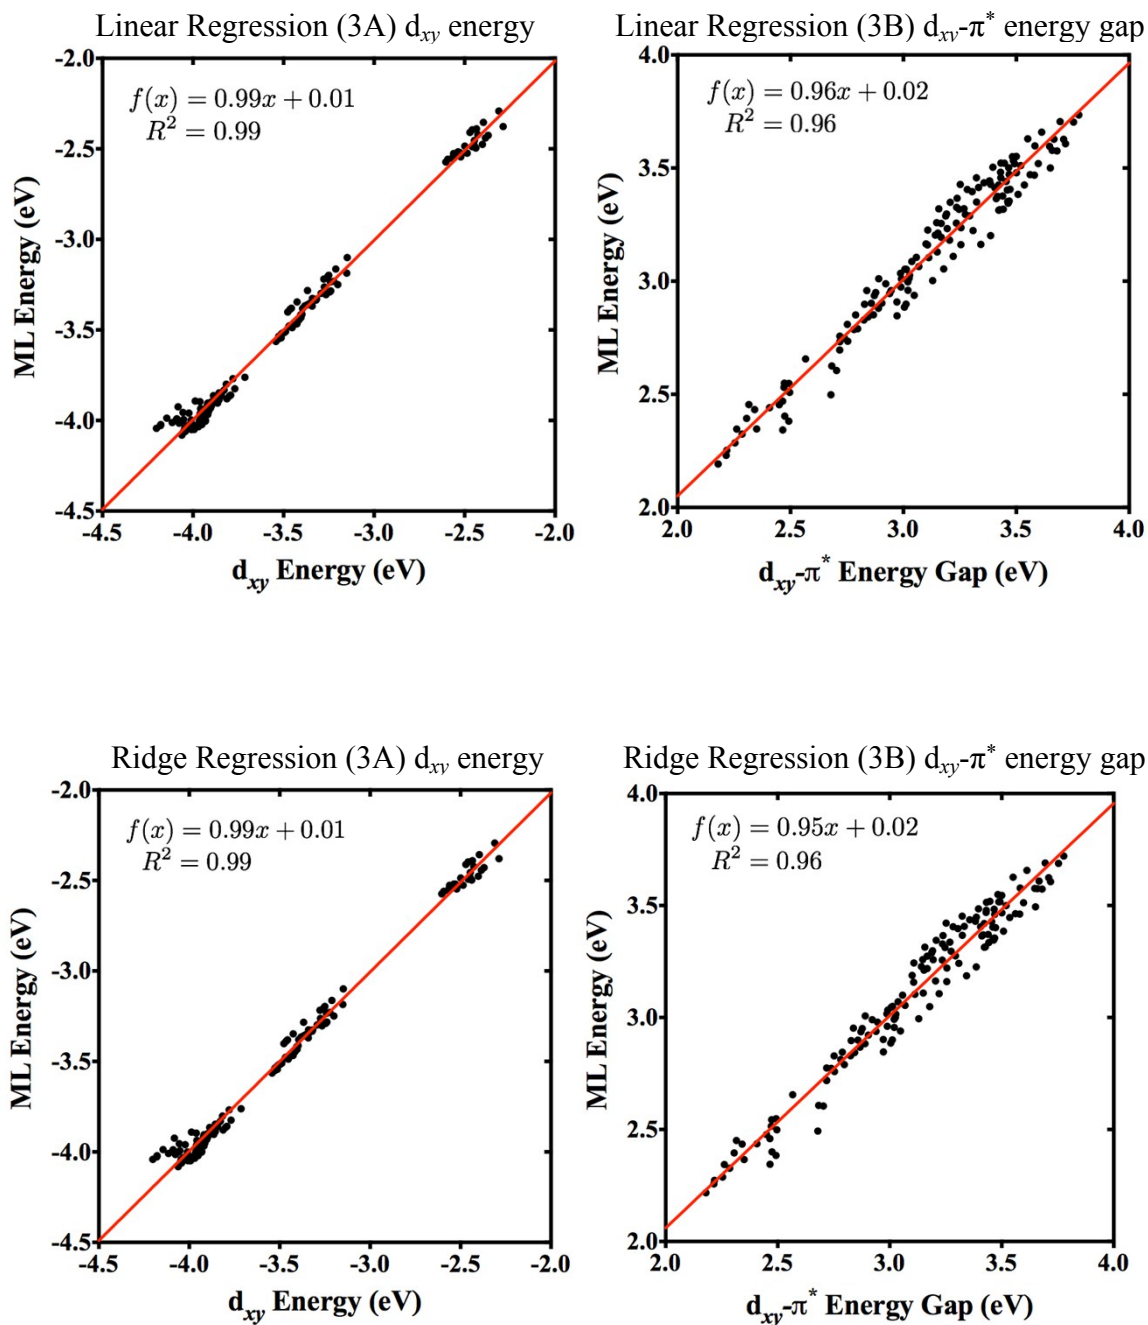

Ridge Regression with Cross Validation (3A)  $d_{xy}$  energy

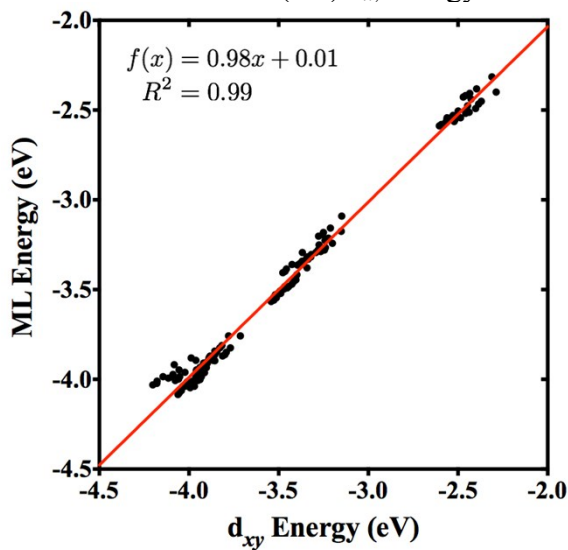

Ridge Regression with Cross Validation (3B)  $d_{xy}-\pi^*$  energy gap

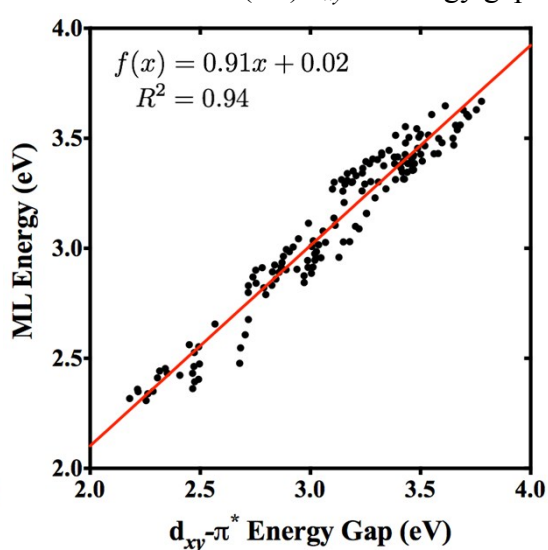

LASSO Regression (3A)  $d_{xy}$  energy

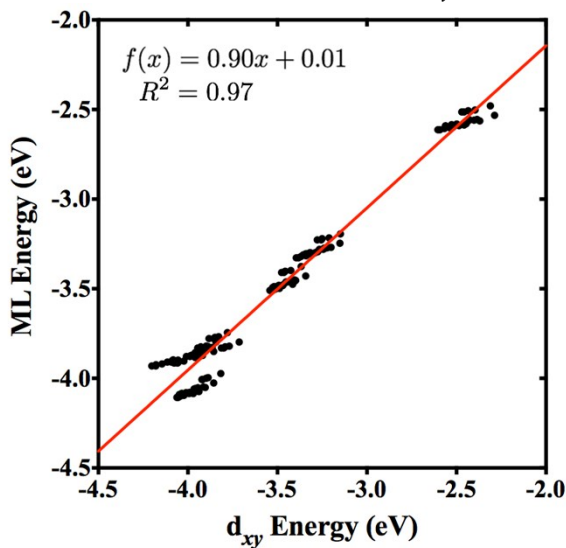

LASSO Regression (3B)  $d_{xy}-\pi^*$  energy gap

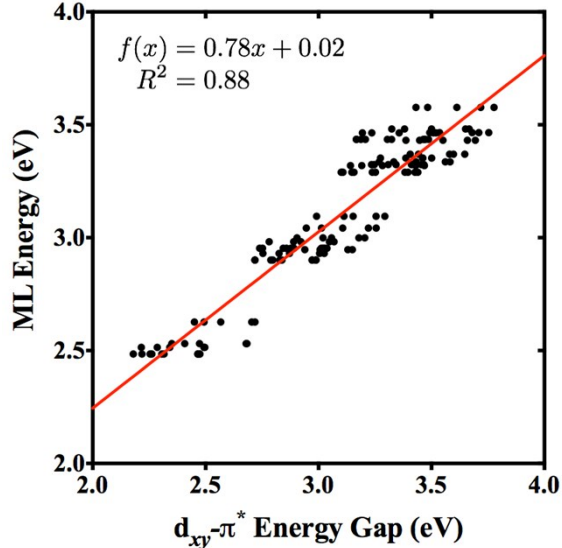

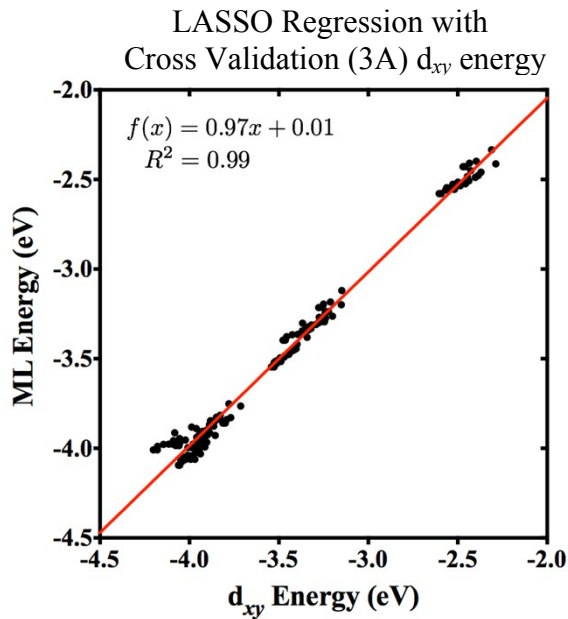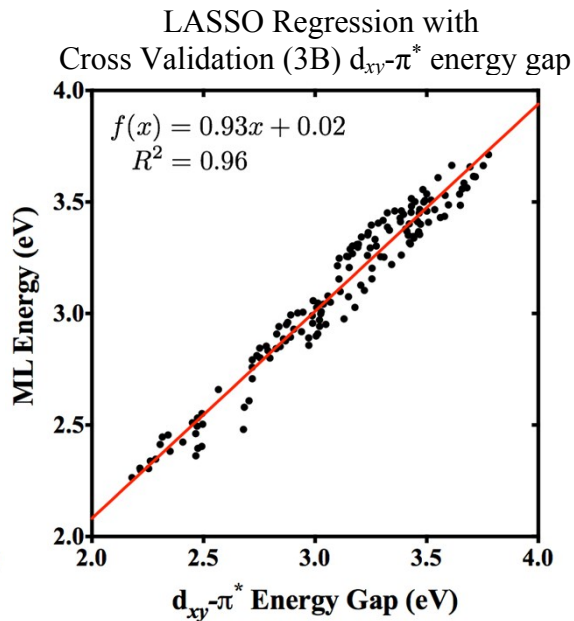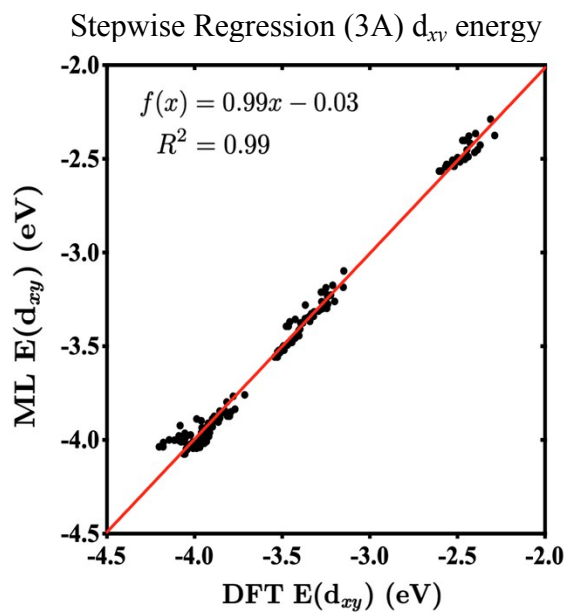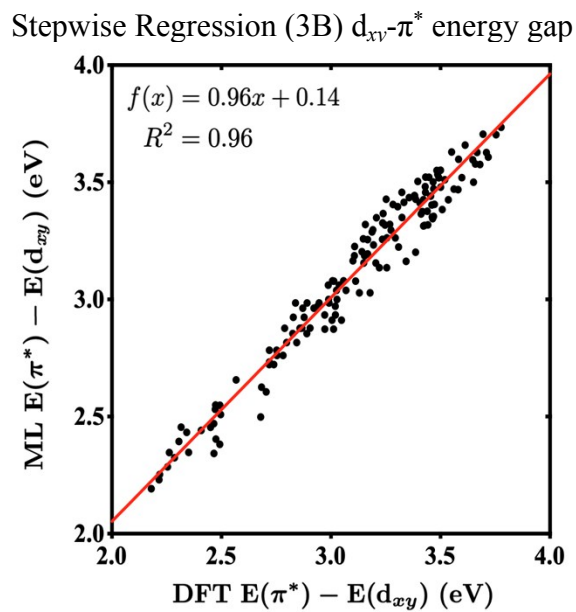



Gaussian Process (3A)  $d_{xy}$  energy

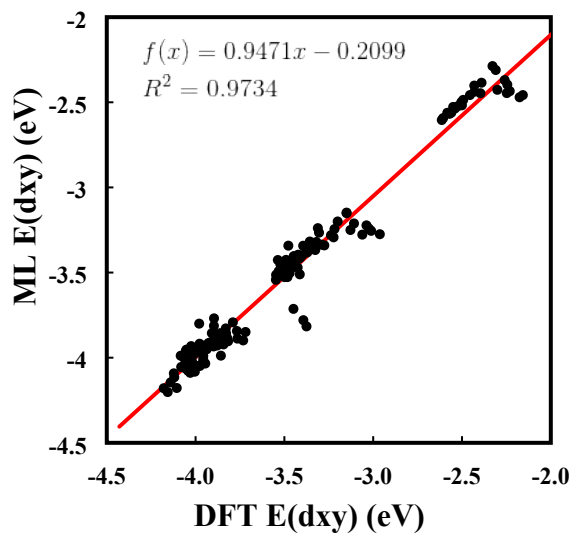

Gaussian Process (3B)  $d_{xy}-\pi^*$  energy gap

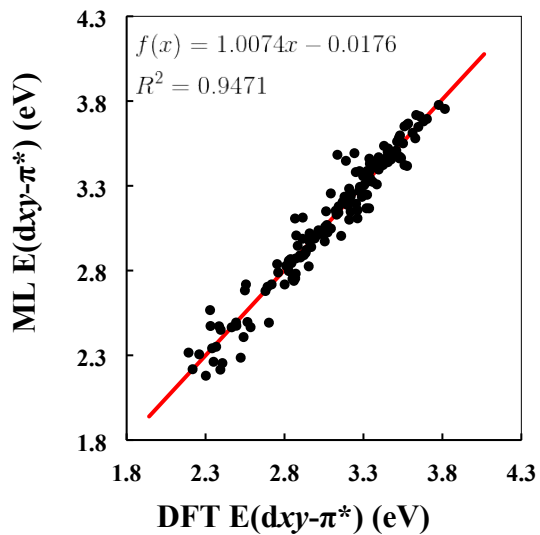

Gaussian Process (4A)  $d_{xy}$  energy

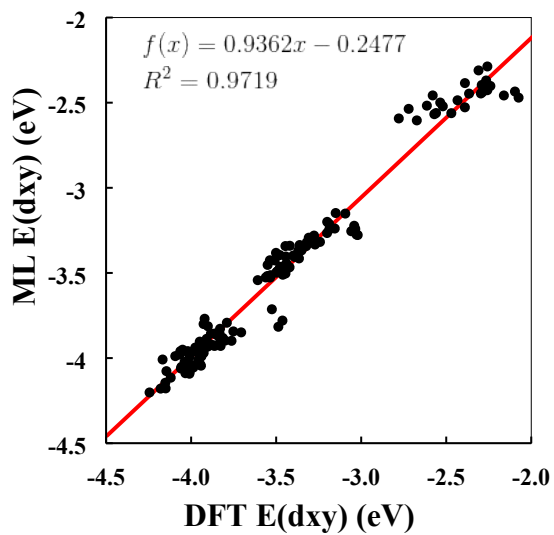

Gaussian Process (4B)  $d_{xy}-\pi^*$  energy gap

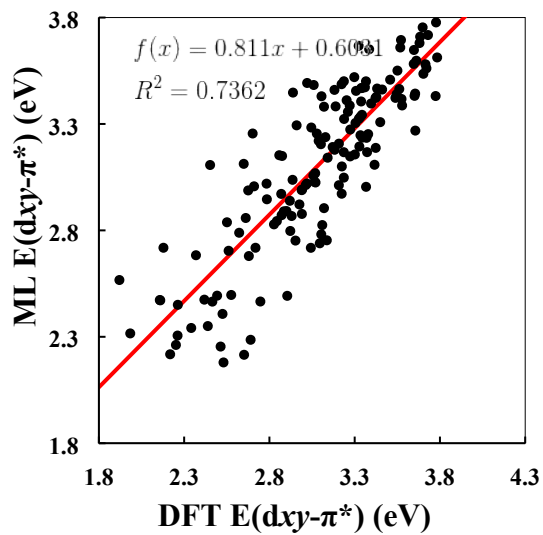

Set 2A NN-predicted  $d_{xy}$  energy (120 molecules used for training)

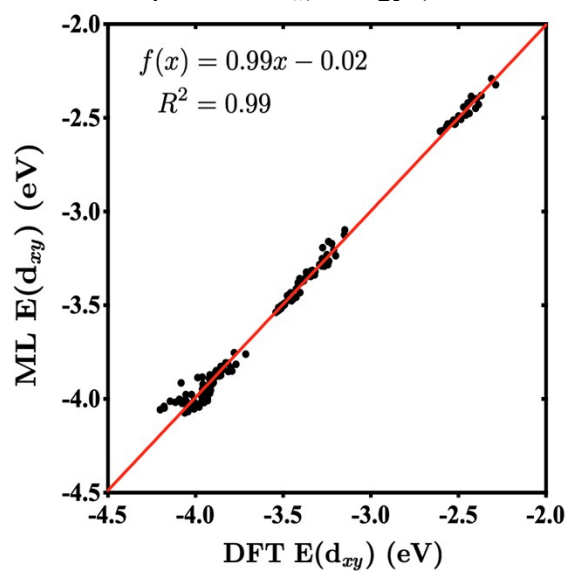

Set 2B NN-predicted  $d_{xy}-\pi^*$  energy gap (120 molecules used for training)

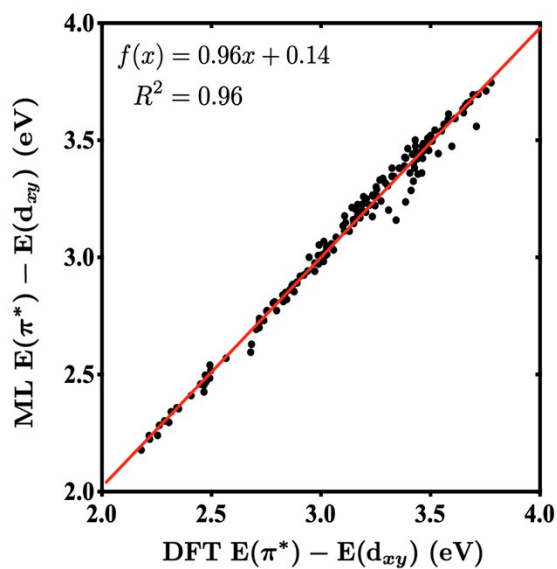

## VIII. Catalyst Predictions for Regressive Models

This table presents the prediction results for each regressive method for datasets **3A/3B** and **4A/4B**, where **A** refers to the  $d_{xy}$  energy as the label, **B** refers to the  $d_{xy}-\pi^*$  energy gap as the label, **3** refers to using all Hammett parameters for input with a 30/120 train/test split that was hand selected to cover all ligands equally, and **4** has the same data split but only uses the parameters,  $R^{\sigma_m}$ ,  $R^{\sigma_p}$ ,  $L_1^{\sigma_p}$ ,  $L_2^{\sigma_m}$ ,  $L_2^{\sigma_p}$ ,  $L_3^{\sigma_p}$ , and  $X^{\sigma_p}$ , as selected by the LASSO cost function. Percentages refer to the DFT prediction being found in the top X% of that models predictions. The DFT predictions column below highlight the RLX code that corresponds to Table III.B. for convenience. Abbreviations: Cross-Validation (CV); Neural Network (CV); Gaussian Process Regression (GPR). Point – by – point data and code available upon request.

| Dataset | DFT Prediction                    | Linear | Ridge | LASSO | NN   | Ridge CV | LASSO CV | GPR  |
|---------|-----------------------------------|--------|-------|-------|------|----------|----------|------|
| 3A      | Top Reducing (513)                | 5%     | 5%    | 5%    | 5%   | 5%       | 5%       | 10%  |
|         | 2nd Top Reducing (515)            | Best   | Best  | Best  | Best | Best     | Best     | 10%  |
| 3B      | Largest Gap (521)                 | Best   | Best  | Best  | Best | Best     | Best     | 5%   |
|         | 2 <sup>nd</sup> Largest Gap (541) | 5%     | 5%    | 10%   | 5%   | 5%       | 5%       | Best |
| 4A      | Top Reducing (513)                | 5%     | 5%    | 5%    | 5%   | 5%       | 5%       | 5%   |
| 4B      | Largest Gap (541)                 | 5%     | 5%    | 10%   | 5%   | 5%       | 5%       | 5%   |

## IX. DFT Theoretical Coordinates

The first line indicates the number of atoms, the second line indicates the compound number. Only the coordinates of the top two reducing catalysts are shown.

74

**513**

|   |          |          |          |
|---|----------|----------|----------|
| W | 1.10998  | -0.00000 | -0.00533 |
| C | -0.72360 | -0.00001 | -0.06701 |
| N | 1.41850  | 1.90298  | -1.48443 |
| N | 1.17242  | 1.88603  | 1.49813  |
| N | 1.17244  | -1.88603 | 1.49813  |
| N | 1.41852  | -1.90298 | -1.48442 |
| C | 1.76272  | -3.05351 | -0.61557 |
| C | 0.94073  | -3.08294 | 0.65574  |
| H | -0.12921 | -3.11088 | 0.41117  |
| H | 1.17212  | -4.01016 | 1.22053  |
| H | 2.83084  | -2.97632 | -0.36795 |
| H | 1.63100  | -4.00915 | -1.16287 |
| C | 1.76269  | 3.05352  | -0.61558 |
| C | 0.94069  | 3.08293  | 0.65574  |
| H | 1.17208  | 4.01016  | 1.22052  |
| H | -0.12925 | 3.11087  | 0.41117  |
| H | 1.63095  | 4.00916  | -1.16288 |
| H | 2.83080  | 2.97634  | -0.36796 |
| C | 0.18068  | -2.19012 | -2.23650 |
| H | -0.08670 | -1.31594 | -2.84134 |
| H | -0.65275 | -2.37193 | -1.55194 |
| H | 0.32193  | -3.07085 | -2.89726 |
| C | 2.51569  | -1.73566 | -2.45533 |
| H | 3.40706  | -1.36594 | -1.93573 |
| H | 2.22099  | -1.00653 | -3.21813 |
| H | 2.74265  | -2.69371 | -2.96587 |
| C | 0.10793  | -1.83804 | 2.51814  |
| H | -0.86090 | -1.66780 | 2.03587  |
| H | 0.29912  | -1.00922 | 3.20878  |
| H | 0.08318  | -2.78113 | 3.10310  |
| C | 2.46868  | -2.00496 | 2.19334  |
| H | 3.29239  | -2.04168 | 1.47467  |
| H | 2.49030  | -2.91012 | 2.83273  |
| H | 2.62312  | -1.12135 | 2.82455  |
| C | 2.51568  | 1.73567  | -2.45533 |
| H | 2.22099  | 1.00653  | -3.21812 |
| H | 3.40705  | 1.36597  | -1.93573 |
| H | 2.74261  | 2.69371  | -2.96588 |
| C | 0.18066  | 2.19010  | -2.23651 |

|   |          |          |          |
|---|----------|----------|----------|
| H | -0.08671 | 1.31592  | -2.84134 |
| H | 0.32190  | 3.07083  | -2.89727 |
| H | -0.65277 | 2.37191  | -1.55195 |
| C | 0.10792  | 1.83804  | 2.51814  |
| H | 0.29912  | 1.00923  | 3.20879  |
| H | -0.86091 | 1.66777  | 2.03588  |
| H | 0.08315  | 2.78113  | 3.10309  |
| C | 2.46866  | 2.00498  | 2.19334  |
| H | 3.29237  | 2.04173  | 1.47466  |
| H | 2.62312  | 1.12136  | 2.82454  |
| H | 2.49026  | 2.91014  | 2.83273  |
| C | -2.16672 | -0.00001 | -0.05099 |
| C | -2.93915 | 1.19346  | -0.03766 |
| C | -2.93915 | -1.19348 | -0.03766 |
| C | -4.33223 | -1.20151 | -0.01134 |
| C | -5.07853 | -0.00000 | 0.01577  |
| C | -4.33222 | 1.20150  | -0.01134 |
| H | -2.41995 | -2.15621 | -0.05186 |
| H | -4.84163 | -2.16569 | -0.00820 |
| H | -4.84162 | 2.16568  | -0.00820 |
| C | 4.59933  | 0.00004  | 0.22842  |
| H | 5.17259  | -0.00003 | -0.73195 |
| H | 4.98022  | 0.88750  | 0.79405  |
| H | 4.98025  | -0.88732 | 0.79420  |
| H | -2.41995 | 2.15619  | -0.05185 |
| N | -6.47710 | -0.00000 | 0.07383  |
| C | -7.18970 | 1.23962  | -0.13280 |
| H | -7.01793 | 1.68723  | -1.13514 |
| H | -8.26880 | 1.06378  | -0.02167 |
| H | -6.90496 | 1.99882  | 0.61597  |
| C | -7.18970 | -1.23962 | -0.13281 |
| H | -6.90497 | -1.99883 | 0.61595  |
| H | -8.26880 | -1.06378 | -0.02167 |
| H | -7.01793 | -1.68722 | -1.13515 |
| O | 3.24570  | -0.00000 | 0.04965  |

78

**515**

|   |          |          |          |
|---|----------|----------|----------|
| W | -1.10570 | 0.00000  | 0.00257  |
| C | 0.73429  | -0.00001 | 0.05697  |
| N | -1.23726 | 1.94018  | 1.54210  |
| N | -0.98104 | 2.00398  | -1.46839 |
| N | -0.98106 | -2.00396 | -1.46841 |
| N | -1.23726 | -1.94019 | 1.54209  |
| C | -1.33742 | -3.15796 | 0.70320  |
| C | -0.50552 | -3.06895 | -0.55781 |
| H | 0.53809  | -2.85127 | -0.30497 |
| H | -0.52513 | -4.05251 | -1.07319 |
| H | -2.39536 | -3.29799 | 0.44127  |
| H | -1.03383 | -4.05324 | 1.28285  |
| C | -1.33741 | 3.15795  | 0.70323  |
| C | -0.50549 | 3.06895  | -0.55778 |
| H | -0.52510 | 4.05252  | -1.07315 |
| H | 0.53811  | 2.85126  | -0.30494 |
| H | -1.03381 | 4.05323  | 1.28288  |
| H | -2.39534 | 3.29799  | 0.44129  |
| C | 0.00019  | -1.99521 | 2.34824  |
| H | 0.08116  | -1.08526 | 2.95333  |
| H | 0.88241  | -2.03635 | 1.70529  |
| H | -0.01845 | -2.87844 | 3.02024  |
| C | -2.36875 | -1.95891 | 2.48504  |
| H | -3.31652 | -1.93327 | 1.93971  |
| H | -2.31570 | -1.08451 | 3.14597  |
| H | -2.34146 | -2.87140 | 3.11452  |
| C | 0.02623  | -1.82866 | -2.53092 |
| H | 0.96884  | -1.47964 | -2.09578 |
| H | -0.32684 | -1.07753 | -3.24764 |
| H | 0.19392  | -2.78111 | -3.07620 |
| C | -2.23529 | -2.44456 | -2.10679 |
| H | -3.05139 | -2.48116 | -1.37829 |
| H | -2.10620 | -3.44057 | -2.57590 |
| H | -2.51893 | -1.73052 | -2.88588 |
| C | -2.36874 | 1.95890  | 2.48505  |
| H | -2.31571 | 1.08449  | 3.14597  |
| H | -3.31652 | 1.93325  | 1.93971  |
| H | -2.34147 | 2.87138  | 3.11452  |
| C | 0.00020  | 1.99518  | 2.34826  |
| H | 0.08115  | 1.08523  | 2.95335  |
| H | -0.01845 | 2.87841  | 3.02026  |
| H | 0.88242  | 2.03632  | 1.70531  |
| C | 0.02626  | 1.82868  | -2.53091 |
| H | -0.32682 | 1.07755  | -3.24763 |

|   |          |          |          |
|---|----------|----------|----------|
| H | 0.96886  | 1.47965  | -2.09577 |
| H | 0.19395  | 2.78113  | -3.07617 |
| C | -2.23526 | 2.44459  | -2.10677 |
| H | -3.05137 | 2.48119  | -1.37828 |
| H | -2.51890 | 1.73057  | -2.88588 |
| H | -2.10616 | 3.44062  | -2.57586 |
| C | 2.18354  | -0.00001 | 0.02813  |
| C | 2.96051  | 1.19148  | 0.01516  |
| C | 2.96051  | -1.19149 | 0.01517  |
| C | 4.35330  | -1.20118 | -0.00903 |
| C | 5.10045  | -0.00001 | -0.03392 |
| C | 4.35329  | 1.20117  | -0.00904 |
| H | 2.44972  | -2.15762 | 0.02595  |
| H | 4.86154  | -2.16583 | -0.01254 |
| H | 4.86153  | 2.16582  | -0.01257 |
| N | -3.41368 | 0.00001  | -0.25542 |
| C | -4.43869 | -0.00001 | 0.75824  |
| H | -4.03419 | -0.00000 | 1.77751  |
| H | -5.12591 | 0.88388  | 0.69256  |
| H | -5.12587 | -0.88393 | 0.69256  |
| C | -4.11491 | 0.00002  | -1.51462 |
| H | -4.78969 | -0.88429 | -1.64522 |
| H | -4.78969 | 0.88433  | -1.64520 |
| H | -3.43448 | 0.00003  | -2.37708 |
| H | 2.44970  | 2.15760  | 0.02592  |
| N | 6.49489  | -0.00000 | -0.08583 |
| C | 7.21116  | 1.24332  | 0.08592  |
| H | 7.03744  | 1.71762  | 1.07466  |
| H | 8.28974  | 1.06090  | -0.01596 |
| H | 6.93072  | 1.98279  | -0.68445 |
| C | 7.21116  | -1.24332 | 0.08590  |
| H | 6.93071  | -1.98279 | -0.68446 |
| H | 8.28975  | -1.06090 | -0.01601 |
| H | 7.03747  | -1.71763 | 1.07465  |

## X. Training and Validation Loss Graph

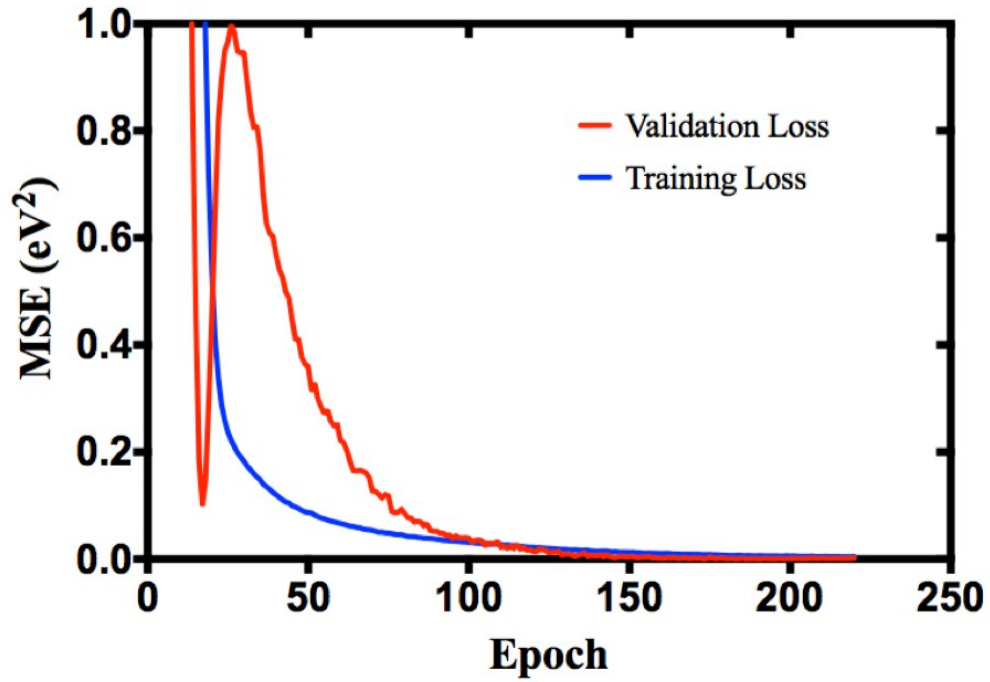

Validation loss and training loss curves are depicted for 220 epochs. The first few epochs are left out for the purpose of the scaling of the graph.



## XI. Effect of $\alpha$ Hyperparameter on Ridge Regression Weights and MSE

|                           | Linear | Ridge |       |       |       |
|---------------------------|--------|-------|-------|-------|-------|
| $\alpha$                  | --     | 0     | 0.001 | 0.005 | 0.01  |
| R $\sigma_m$              | 0.41   | 0.41  | 0.4   | 0.39  | 0.38  |
| R $\sigma_p$              | -0.39  | -0.39 | -0.39 | -0.39 | -0.39 |
| L <sub>1</sub> $\sigma_m$ | 0.29   | -5.28 | 0.29  | 0.29  | 0.29  |
| L <sub>1</sub> $\sigma_p$ | 0.41   | 2.58  | 0.41  | 0.41  | 0.42  |
| L <sub>2</sub> $\sigma_m$ | 0.31   | 8.57  | 0.31  | 0.31  | 0.31  |
| L <sub>2</sub> $\sigma_p$ | 0.47   | -2.74 | 0.47  | 0.47  | 0.47  |
| L <sub>3</sub> $\sigma_m$ | 0.13   | -2.56 | 0.13  | 0.13  | 0.13  |
| L <sub>3</sub> $\sigma_p$ | 0.01   | 1.056 | 0.011 | 0.012 | 0.014 |
| X $\sigma_m$              | 1.7    | 1.7   | 1.67  | 1.58  | 1.47  |
| X $\sigma_p$              | -0.75  | -0.75 | -0.73 | -0.69 | -0.64 |
| MSE                       | 0.017  | 0.017 | 0.017 | 0.017 | 0.017 |

### References

1. Hammett, L. P., The Effect of Structure upon the Reactions of Organic Compounds. Benzene Derivatives. *J. Am. Chem. Soc.* **1937**, 59 (1), 96-103.
